# Supplementary material for: History of coronary heart disease increased the mortality rate of patients with COVID-19: a nested case–control study
Source: PubMed Central journal article supplement — BMJ Open. 2020 Sep 17;10(9):e038976. doi: 10.1136/bmjopen-2020-038976 (PMC7499679; doi:10.1136/bmjopen-2020-038976), 2020-09-17
Supplement: bmjopen-2020-038976.draft_revisions.pdf [file bmjopen-2020-038976.draft_revisions.pdf]

# BMJ Open

BMJ Open is committed to open peer review. As part of this commitment we make the peer review history of every article we publish publicly available.

When an article is published we post the peer reviewers' comments and the authors' responses online. We also post the versions of the paper that were used during peer review. These are the versions that the peer review comments apply to.

The versions of the paper that follow are the versions that were submitted during the peer review process. They are not the versions of record or the final published versions. They should not be cited or distributed as the published version of this manuscript.

BMJ Open is an open access journal and the full, final, typeset and author-corrected version of record of the manuscript is available on our site with no access controls, subscription charges or pay-per-view fees (<http://bmjopen.bmj.com>).

If you have any questions on BMJ Open's open peer review process please email [info.bmjopen@bmj.com](mailto:info.bmjopen@bmj.com)

# BMJ Open

## History of coronary heart disease increases the mortality rate of COVID-19 patients: a nested case-control study

|                               |                                                                                                                                                                                                                                                                                                                                                                                                                                                                                                                                                                                                                                                                                                                                    |
|-------------------------------|------------------------------------------------------------------------------------------------------------------------------------------------------------------------------------------------------------------------------------------------------------------------------------------------------------------------------------------------------------------------------------------------------------------------------------------------------------------------------------------------------------------------------------------------------------------------------------------------------------------------------------------------------------------------------------------------------------------------------------|
| Journal:                      | <i>BMJ Open</i>                                                                                                                                                                                                                                                                                                                                                                                                                                                                                                                                                                                                                                                                                                                    |
| Manuscript ID                 | bmjopen-2020-038976                                                                                                                                                                                                                                                                                                                                                                                                                                                                                                                                                                                                                                                                                                                |
| Article Type:                 | Original research                                                                                                                                                                                                                                                                                                                                                                                                                                                                                                                                                                                                                                                                                                                  |
| Date Submitted by the Author: | 31-Mar-2020                                                                                                                                                                                                                                                                                                                                                                                                                                                                                                                                                                                                                                                                                                                        |
| Complete List of Authors:     | Gu, Tian; University of Michigan, Biostatistics<br>Chu, Qiao; Shanghai Jiao Tong University School of Medicine, School of Public Health<br>Zhang-Sheng, Yu; Shanghai Jiao Tong University, Department of Bioinformatics and Biostatistics<br>Fa, Botao; Shanghai Jiao Tong University, Department of Bioinformatics and Biostatistics<br>Li, Anqi; East China Normal University, School of Social Development<br>Xu, Lei; Shanghai Chest Hospital, Department of Cardiology; Shanghai Jiao Tong University<br>Wu, Ruijun; East China Normal University, School of Social Development<br>He, Yaping; Shanghai Jiao Tong University, School of Public Health; Shanghai Jiao Tong University, Center for Health Technology Assessment |
| Keywords:                     | Epidemiology < INFECTIOUS DISEASES, Coronary heart disease < CARDIOLOGY, EPIDEMIOLOGY                                                                                                                                                                                                                                                                                                                                                                                                                                                                                                                                                                                                                                              |
|                               |                                                                                                                                                                                                                                                                                                                                                                                                                                                                                                                                                                                                                                                                                                                                    |

SCHOLARONE™  
Manuscripts

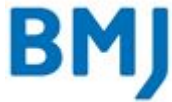

I, the Submitting Author has the right to grant and does grant on behalf of all authors of the Work (as defined in the below author licence), an exclusive licence and/or a non-exclusive licence for contributions from authors who are: i) UK Crown employees; ii) where BMJ has agreed a CC-BY licence shall apply, and/or iii) in accordance with the terms applicable for US Federal Government officers or employees acting as part of their official duties; on a worldwide, perpetual, irrevocable, royalty-free basis to BMJ Publishing Group Ltd ("BMJ") its licensees and where the relevant Journal is co-owned by BMJ to the co-owners of the Journal, to publish the Work in this journal and any other BMJ products and to exploit all rights, as set out in our [licence](#).

The Submitting Author accepts and understands that any supply made under these terms is made by BMJ to the Submitting Author unless you are acting as an employee on behalf of your employer or a postgraduate student of an affiliated institution which is paying any applicable article publishing charge ("APC") for Open Access articles. Where the Submitting Author wishes to make the Work available on an Open Access basis (and intends to pay the relevant APC), the terms of reuse of such Open Access shall be governed by a Creative Commons licence – details of these licences and which [Creative Commons](#) licence will apply to this Work are set out in our licence referred to above.

Other than as permitted in any relevant BMJ Author's Self Archiving Policies, I confirm this Work has not been accepted for publication elsewhere, is not being considered for publication elsewhere and does not duplicate material already published. I confirm all authors consent to publication of this Work and authorise the granting of this licence.

# History of coronary heart disease increases the mortality rate of COVID-19 patients: a nested case-control study

Tian Gu<sup>1</sup>, MS, Qiao Chu<sup>2</sup>, Ph.D., Zhangsheng Yu<sup>3</sup>, Ph.D., Botao Fa<sup>3</sup>, MS, Anqi Li<sup>4</sup>, MS, Lei Xu<sup>5</sup>, MD, Ruijun Wu<sup>4</sup>, Ph.D., Yaping He<sup>2</sup>, Ph.D.

## Affiliations:

1. Department of Biostatistics, School of Public Health, University of Michigan, Ann Arbor, MI
2. School of Public Health, Shanghai Jiao Tong University School of Medicine, Shanghai, China
3. Department of Bioinformatics and Biostatistics, Shanghai Jiao Tong University, Shanghai, China
4. School of Social Development, East China Normal University, Shanghai, China
5. Department of Cardiology, Shanghai Chest Hospital, Shanghai Jiao Tong University, Shanghai, China

## Corresponding authors:

Prof. Ruijun Wu: School of Social Development, East China Normal University, 500 Dongchuan Rd., Shanghai 200241, China ([rjwu@re.ecnu.edu.cn](mailto:rjwu@re.ecnu.edu.cn)).

Prof. Yaping He: College of Public Health, Shanghai Jiao Tong University School of Medicine, South Chongqing Rd., No. 227, Shanghai 200025, China ([hypeyr@sina.com](mailto:hypeyr@sina.com)).

## Abstract

**Objective:** Evaluate the risk of pre-existing comorbidities on COVID-19 mortality, and provide clinical suggestions accordingly.

**Setting:** Confirmed cases reports released from news or national/provincial health/municipal commission of China between December 18<sup>th</sup>, 2019 and March 8<sup>th</sup>, 2020.

**Participants:** Patients with confirmed SARS-CoV-2 infection in mainland China outside of Hubei Province.

**Outcome measures:** Patient demographics, survival time and status, and history of comorbidities.

**Method:** This study used a nested case-control design. A total of 94 publicly reported deaths were included as cases. Each case was matched with up to three controls, based on gender and age  $\pm$  1 year old (94 cases and 181 controls). Survival time was from symptom onset to death/end of study. The inverse probability weighted Cox proportional hazard model was used to evaluate the mortality risk of pre-existing comorbidities associated with survival time.

**Results:** History of comorbidities significantly increased the death risk of COVID-19: one additional pre-existing comorbidity led to an estimated 40% higher risk of death ( $p < 0.001$ ). The estimated mortality risk in patients with CHD was three times of those without CHD ( $p < 0.001$ ). The estimated 30-day survival probability for a profile patient with pre-existing CHD (65-year-old female with no other comorbidities) was 0.53 (95% CI [0.34-0.82]), while it was 0.85 (95% CI [0.79-0.91]) for those without CHD. Older age was also associated with increased death risk: every 5-year increase in age was associated with a 20% increased risk of mortality ( $p < 0.001$ ).

**Conclusion:** Extra care and early medical intervention are needed for patients with pre-existing comorbidities, especially CHD.

## Strengths and limitations of this study

**Strengths:** (i) The study used data outside of the epicenter of the outbreak in mainland China, which avoided the competing death risk caused by insufficient health care resources and revealed the true underlying impact of pre-existing comorbidities on mortality; (ii) we accounted for the confounding effects of death risk during analysis to provide accurate estimation, which were in general not considered in the existing literature; and (iii) the survival-time-related statistical results can help guide the early clinical intervention to reduce the mortality.

1  
2  
3 **limitations:** Publicly reported data does not contain patient clinical test results, which restricted  
4 further investigation on the association between comorbidity-related clinical index and mortality.  
5  
6  
7

## 8 9 **Introduction**

10  
11 Since the first report of Coronavirus Disease 2019 (COVID-19) in December 2019 in  
12 Wuhan, Hubei Province, China, the novel virus infection has rapidly spread to other cities in  
13 China, and has now been detected in 186 countries and locations internationally [1]. On March  
14 11<sup>th</sup>, 2020, the World Health Organization declared COVID-19 a pandemic, and has called for  
15 aggressive actions from all countries to fight the disease. Current research has indicated that  
16 COVID-19 is caused by severe acute respiratory syndrome coronavirus 2 (SARS-CoV-2), a beta-  
17 coronavirus similar to the severe acute respiratory syndrome-coronavirus (SARS-CoV) in the  
18 genetic sequence [2]. Epidemiological evidence suggests that initially reported cases in China  
19 had a history of exposure to the Huanan seafood market [3-4]. With the escalated spread of the  
20 infection, there has been clear evidence of human to human transmission [5-6]. The most  
21 common symptoms include fever, dry cough and fatigue [5-8], with presence of asymptomatic,  
22 yet contagious cases [9].  
23  
24  
25  
26  
27  
28  
29  
30  
31

32 According to the COVID-19 situation reports of WHO, as of March 29<sup>th</sup>, 2020, the  
33 infection has caused 81,445 confirmed cases in mainland China, including 3,300 deaths.  
34 Internationally, a total of 601,020 confirmed cases have been reported from 186 countries  
35 outside of China, including 28,747 deaths. Considering the global public health threat posed by  
36 COVID-19, unraveling the prognostic factors for patients, especially the risk factors of mortality  
37 associated with COVID-19, has important implications for clinical practice and is urgently  
38 warranted.  
39  
40  
41  
42  
43

44 Studies have indicated that severe cases tend to be older in age [6, 8] and are more likely  
45 to have had pre-existing medical conditions, including but not limited to hypertension [3, 6, 8],  
46 diabetes [6, 8], cardiovascular diseases [3, 6, 8, 10-12], cerebrovascular diseases [6], chronic  
47 obstructive pulmonary disease (COPD) [3, 8], cancer [13], and digestive diseases [14], in  
48 comparison to non-severe cases [3, 6, 8-15].  
49  
50  
51

52 Recently, scholarly attention focuses on identifying the risk factors for death from  
53 COVID-19. Some evidence suggests that pre-existing medical conditions are likely death risk  
54  
55  
56  
57  
58  
59  
60

1  
2  
3 factors for COVID-19. For example, a study based on 72,314 cases in China indicated that the  
4 case-fatality rate (CFR) tends to be higher among those with older age, and having pre-existing  
5 cardiovascular disease, diabetes, and hypertension compared to all the patients [9]. Similarly, by  
6 conducting logistic regression on odds of in-hospital death among 54 diseased patients and 137  
7 recovered patients in Wuhan City, Hubei Province, Zhou et al. [16] found that older age, higher  
8 Sequential Organ Failure Assessment (SOFA) score and d-dimer greater than 1ug/ml at hospital  
9 admission were associated with increased odds of in-hospital death. Chen et al. (2020) found that  
10 pre-existing hypertension and other cardiovascular complications were more common among  
11 diseased patients than recovered patients (unpublished data).  
12  
13  
14  
15  
16  
17  
18

19 However, several gaps remain in the understanding of risk factors for mortality of  
20 COVID-19. First, most current research on pre-existing comorbidities of COVID-19 was based  
21 on univariate comparison, which did not account for important confounders such as age and  
22 gender [17-20]. Second, no studies have investigated the hazard of the identified risk factors over  
23 time, or the probability of survival at a given time. Under the rapidly changing pandemic  
24 situation, it is crucial to provide timely survival-time guidance for implementing the targeted  
25 treatment to the high-risk patients in clinical practice. Third, most existing studies on mortality  
26 risk factors were focused on patients diagnosed in Wuhan, Hubei Province, with little  
27 understanding about the mortality risk factors outside of Hubei Province. The risk factors are  
28 likely different inside and outside of Hubei Province, since current research has found that the  
29 clinical symptom severity [5] and the fatality-case rate [9, 21] to be higher in Hubei Province  
30 (the center of outbreak) than cities outside of Hubei Province in China. Fourth, no studies thus  
31 far have taken into account the pandemic stage when evaluating mortality risk factors. It has  
32 been found that average daily attack rate in China was different before and after January 11<sup>th</sup>  
33 2020, since non-pharmaceutical interventions were taken by the government before this date  
34 [22]. The change of pandemic stage may also influence the risk factors for fatality associated  
35 with COVID-19.  
36  
37  
38  
39  
40  
41  
42  
43  
44  
45  
46  
47

48 To fill the above research gaps in the existing literature about the mortality risk factors for  
49 COVID-19, the present study conducted a nested case-control (NCC) study, aiming to evaluate  
50 the risk of the common pre-existing comorbidities (hypertension, coronary heart disease,  
51 diabetes and etc.) for mortality associated with COVID-19 in mainland China outside of Hubei  
52 Province. NCC, also called risk set sampling, has been widely used in studying the fatal disease  
53  
54  
55  
56  
57  
58  
59  
60

1  
2  
3 risk effect in large pharmacoepidemiologic studies [23-28] and risk prediction in pandemic  
4 influenza A (H1N1) 2009 (pH1N1) [29]. NCC is cost-effective in data collection, and is  
5 especially suitable for research on the death risk of diseases such as COVID-19, where the  
6 number of event-free people largely exceeds those who experienced events [30]. To attain this  
7 goal, we employed survival analysis on 275 publicly reported confirmed cases, adjusting for age,  
8 gender and the change in the pandemic stage in China (i.e., before and after January 11<sup>th</sup>, 2020).  
9

## 14 **Method**

### 17 **Study Design and Rationale**

18 This study performed survival analysis under a nested case-control (NCC) design to  
19 assess the roles of common comorbidities (cardiocerebrovascular, endocrine and respiratory  
20 disease, etc.) in predicting mortality for COVID-19, among patients in mainland China outside of  
21 Hubei Province. The study period was from December 18<sup>th</sup>, 2019, when the first laboratory-  
22 confirmed case was announced in China, till March 8<sup>th</sup>, 2020.  
23  
24  
25  
26

27 The study cohort was defined as all the publicly reported confirmed COVID-19 patients  
28 outside of Hubei Province in mainland China between the study period. During this period, 112  
29 deaths outside of Hubei Province were reported by the National Health Committee of China, and  
30 18 were excluded from the present study due to missingness of important clinical information. A  
31 total of 408 publicly reported laboratory-confirmed COVID-19 cases (94 deaths and 314  
32 survivors) were initially collected. The data collection procedure was blinded to patient  
33 comorbidity information. All deaths were included as cases, and each case was matched with up  
34 to three controls on gender and age  $\pm$  1 year old (94 cases and 181 controls). The sample  
35 distribution across all 32 province-level regions in mainland China is presented in  
36 Supplementary Table S1.  
37  
38  
39  
40  
41  
42  
43

### 44 **Data Collection Procedure**

45 We routinely searched for daily news and public health reports on confirmed COVID-19  
46 cases in all areas in mainland China outside of Hubei Province. Patients' clinical and  
47 comorbidity characteristics were recorded and doubly confirmed by  
48 national/provincial/municipal health commission websites, the official COVID-19 data reporting  
49 websites in China. Follow-up time was defined as the duration from the date of disease onset till  
50 the end of observation on March 8<sup>th</sup> or when the participant died, whichever came first. For each  
51  
52  
53  
54  
55  
56  
57  
58  
59  
60



1  
2  
3 eligible patient, we followed local reports to update their survival status until the end of follow-  
4 up time.  
5

6 As illustrated in Figure 1, the inclusion criterion was publicly reported COVID-19 patients  
7 who had complete information on basic demographics (age, gender and region), disease onset  
8 date--the first time a patient became symptomatic, and history of comorbidities (include but not  
9 limited to hypertension, cardiovascular disease, diabetes and respiratory diseases) were included  
10 in the analysis. Asymptomatic patients were not included in this study. In addition, we defined  
11 “comorbidity-free patients” as those who were specifically described as “no pre-existing medical  
12 condition/comorbidity” on the national/provincial/municipal health commission websites.  
13  
14

15  
16  
17 In the following three steps, we used the No. 261 patient in the sample as an example to  
18 introduce the dynamic tracking method we used to identify any missing dates:  
19  
20

21  
22 **Step 1.** Conducting an internet search on confirmed cases on baidu.com, the largest search  
23 engine in China, using keywords “confirmed COVID-19 cases report” and “pre-existing  
24 comorbidities.” A search result pertained to one confirmed case reported on the website of  
25 Municipal Health Commission of Binzhou (Shandong Province) on February 17<sup>th</sup>,  
26 described as “*the 15<sup>th</sup> confirmed case: 30-year-old male without pre-existing morbidities,*  
27 *who lives in the neighborhood of Xincun Village. This patient was diagnosed positive on*  
28 *February 16<sup>th</sup> and is being treated with precaution in Bincheng hospital.*” We recorded  
29 age, gender, region and comorbidity-free for this patient.  
30  
31

32  
33 **Step 2.** We then determined the onset date of this patient based on another announcement  
34 on the same website. In this announcement titled “*Possible exposure locations and times of*  
35 *the 15<sup>th</sup> confirmed case,*” it says, “*the patient was symptomatic on February 14<sup>th</sup>.*”  
36  
37

38  
39 **Step 3.** Finally, we confirmed the event status of this patient as discharged on March 3<sup>rd</sup>,  
40 by following the updates on this website.  
41  
42  
43  
44  
45

## 46 **Statistical Analysis**

47  
48 Analyses were performed in R 3.6.2 (R Foundation for Statistical Computing). Baseline  
49 clinical characteristics were shown as mean (SD), median (range), or number (%), with a  
50 comparison of characteristics in subjects stratified by case and control via t-test for continuous  
51 variables and chi-squared or Fisher’s exact test for binary variables.  
52  
53  
54  
55  
56  
57  
58  
59  
60

1  
2  
3 In order to utilize the time-to-event information under the NCC design, the inverse  
4 probability weighting Cox proportional hazard regression model was employed [32]. The  
5 matching between cases and controls, and relative weights were simultaneously obtained via  
6 KMprob function in multipleNCC R package [31], by specifying the Kaplan-Meier type weights  
7 with additional matching on gender and age  $\pm 1$  year old. Only survivors were assigned weights,  
8 since all cases (deaths) were included as designed with a weight of one. Those survivors with  
9 sampling probabilities of zero were considered as “fail to match” and excluded from the study.

10  
11 The total number of comorbidities was defined as the summation of comorbidities,  
12 ranging from zero to four or above. Kaplan-Meier curve was plotted to check the proportional  
13 hazard assumption and the Pearson correlation test was used to rule out the multicollinearity  
14 concern before fitting any model. Univariate weighted Cox models were performed for each  
15 comorbidity. The multivariate weighted Cox model was used to determine if pre-existing  
16 comorbidity yielded prognostic hazard information. We included those comorbidities that were  
17 marginally significant ( $p < 0.1$ ) in the univariate analysis to the multivariate model. Other than the  
18 common risk factors (age and gender), the multivariate model also adjusted for early period of  
19 pandemic (after vs. before January 11<sup>th</sup>, 2020 when no-intervention was taken by the  
20 government) [22]. Although matching was based on age and gender, we adjusted for the  
21 matching covariates, since the matching was broken with inverse probability weighting [32]. A  
22 separate multivariate model was built by using the total number of pre-existing comorbidities as  
23 an ordinal predictor, adjusting for the same covariates. Hazard ratios (HRs) from the weighted  
24 Cox model were reported along with 95% confidence intervals (CIs) and p-values. Sensitivity  
25 analysis was performed using multivariate logistic regression to provide estimated odds ratio  
26 (ORs), which includes the same covariates as the multivariate weighted Cox model.

27  
28 Weighted Cox model-based survival estimates were plotted for an example patient profile  
29 (65-year-old female with no other comorbidities) to compare the survival probability over time  
30 with and without CHD. The log-rank test was used to compare the median survival difference.

## 31 32 33 34 35 36 37 38 39 40 41 42 43 44 45 46 47 48 49 50 51 **Results**

### 52 53 **Sample Description**

Table 1 summarizes patient demographics and pre-existing medical conditions. Results are presented for all patients in the study (n=275), as well as for cases (n=94) and controls (n=181), respectively. Patients were 24-94 years old (Mean<sub>age</sub> = 66.4, SD<sub>age</sub> =14.5). The average age tended to be older in the case group (70.7 years old) than in the control group (64.2 years old). Median ages were similar to mean ages in both groups. A majority (62.9%) of the patients were male. Overall, 25.5% of the total patients had clinical symptoms associated with COVID-19 before January 11<sup>th</sup>, 2020. A relatively small proportion of the total sample had COPD, renal failure, history of surgery and hepatic failure (4.4%, 4.4%, 3.6% or 1.1%). Among all pre-existing comorbidities with over 5% of the total sample, hypertension was the most common (39.6%), followed by diabetes (26.2%), CHD (14.5%), cardiac failure (8%), cerebral infarction (6.9%) and chronic bronchitis (6.9%). Patients in the case group had more CHD (p<0.001) and more cerebral infarction (p=0.05), compared to those in the control group. A majority of the total sample had at least one pre-existing comorbidity (67.6%), specifically around 25% had one, 22% had two, 11% had three, and 10% had four or more. Compared to the control group, more patients in the case group had pre-existing comorbidities (p=0.02), especially those who had four or more comorbidities (p<0.001).

**Table 1.** Patient Characteristics, stratified by survival status\*

|                                       | Overall<br>(N=275), n (%) | Case (deaths)<br>(N=94), n (%) | Control (survivors)<br>(N=181), n (%) | P Value † |
|---------------------------------------|---------------------------|--------------------------------|---------------------------------------|-----------|
| <b>Matching variables</b>             |                           |                                |                                       |           |
| Age                                   |                           |                                |                                       |           |
| Mean (SD)                             | 66.4 (14.5)               | 70.7 (13.3)                    | 64.2 (14.7)                           | <0.001    |
| Median (Min, Max)                     | 68.0 [24.0, 94.0]         | 72.5 [25.0, 94.0]              | 67.0 [24.0, 90.0]                     | -         |
| Male                                  | 173 (62.9)                | 56 (59.6)                      | 117 (64.6)                            | 0.49      |
| <b>Other covariates</b>               |                           |                                |                                       |           |
| Before 01/11/2020                     | 70 (25.5)                 | 27 (28.7%)                     | 43 (23.8)                             | 0.52      |
| History of surgery                    | 10 (3.6)                  | 4 (4.3)                        | 6 (3.3)                               | 0.74      |
| <b>Cardiocerebrovascular diseases</b> |                           |                                |                                       |           |
| Hypertension                          | 109 (39.6)                | 42 (44.7)                      | 67 (37.0)                             | 0.27      |
| CHD                                   | 40 (14.5)                 | 25 (26.6)                      | 15 (8.3)                              | <0.001    |
| Cardiac failure                       | 22 (8.0)                  | 10 (10.6)                      | 12 (6.6)                              | 0.35      |
| Cerebral infarction                   | 19 (6.9)                  | 11 (11.7)                      | 8 (4.4)                               | 0.05      |

|                                      |           |           |           |                  |  |
|--------------------------------------|-----------|-----------|-----------|------------------|--|
| <b>Endocrine diseases</b>            |           |           |           |                  |  |
| Diabetes                             | 72 (26.2) | 26 (25.4) | 46 (27.7) | 0.80             |  |
| <b>Respiratory diseases</b>          |           |           |           |                  |  |
| Chronic bronchitis                   | 19 (6.9)  | 7 (7.4)   | 12 (6.6)  | 1.00             |  |
| COPD                                 | 12 (4.4)  | 7 (7.4)   | 5 (2.8)   | 0.14             |  |
| <b>Other diseases</b>                |           |           |           |                  |  |
| Renal failure                        | 12 (4.4)  | 6 (6.4)   | 6 (3.3)   | 0.38             |  |
| Hepatic failure                      | 3 (1.1)   | 3 (3.2)   | 0 (0)     | 0.07             |  |
| <b>Total number of comorbidities</b> |           |           |           |                  |  |
| 0                                    | 89 (32.4) | 21 (22.3) | 68 (37.6) | <b>0.02</b>      |  |
| 1                                    | 68 (24.7) | 18 (19.1) | 50 (27.6) | 0.16             |  |
| 2                                    | 61 (22.2) | 22 (23.4) | 39 (21.5) | 0.84             |  |
| 3                                    | 30 (10.9) | 14 (14.9) | 16 (8.8)  | 0.19             |  |
| 4 and above                          | 27 (9.8)  | 19 (20.2) | 8 (4.4)   | <b>&lt;0.001</b> |  |

CHD: coronary heart disease;

COPD: chronic obstructive pulmonary disease.

\*Mean (standard deviation) is reported for the continuous variables and the counts (%) for categorical variables. p values were calculated by t test,  $\chi^2$  test, or Fisher's exact test, as appropriate.

Bold: statistically significant using threshold  $p < 0.05$ .

## Model Results

Results of the Pearson correlation test showed no significant correlations among the presence of comorbidities of interest, and the assumption of the proportional hazard was not violated.

Table 2 presents the results of univariate and multivariate weighted Cox models. Older age was associated with significantly higher death risk with similar magnitude in univariate and multivariate models. In the adjusted model, every 5-year increase in age was associated with an estimated 20% higher risk of death ( $p < 0.001$ ). No significant hazard difference was found between male and female patients. Disease infection during the early no-intervention period was associated with a higher risk of death, although not statistically significant.

**Table 2.** Univariate and multivariate model result from weighted Cox proportional hazard regression

| Characteristic | Univariate | Multivariate |
|----------------|------------|--------------|
|----------------|------------|--------------|

|                               | HR (95% CI)   | P Value          |
|-------------------------------|---------------|------------------|---------------|------------------|---------------|------------------|---------------|------------------|
| Age                           | 1.1 (1.0-1.1) | <b>&lt;0.001</b> | 1.0 (1.0-1.1) | <b>&lt;0.001</b> | 1.0 (1.0-1.1) | <b>&lt;0.001</b> | 1.0 (1.0-1.1) | <b>&lt;0.001</b> |
| Male                          | 0.8 (0.5-1.2) | 0.24             | 1.1 (0.7-1.7) | 0.74             | 1.1 (0.7-1.7) | 0.71             | 1.0 (0.6-1.6) | 0.99             |
| Before 01/11/2020             | 1.1 (0.7-1.8) | 0.66             | 1.3 (0.8-2.1) | 0.29             | 1.2 (0.7-1.9) | 0.48             | 1.2 (0.7-2.0) | 0.45             |
| Total number of comorbidities | 1.6 (1.4-1.9) | <b>&lt;0.001</b> | 1.4 (1.2-1.7) | <b>&lt;0.001</b> | -             | -                | -             | -                |
| Cardiocerebrovascular         |               |                  |               |                  |               |                  |               |                  |
| CHD                           | 4.2 (2.5-7.1) | <b>&lt;0.001</b> | -             | -                | 2.9 (1.7-4.9) | <b>&lt;0.001</b> | 3.0 (1.8-5.0) | <b>&lt;0.001</b> |
| Hypertension                  | 1.4 (0.9-2.2) | 0.17             | -             | -                | -             | -                | -             | -                |
| Cardiac failure               | 1.9 (0.9-3.9) | 0.10             | -             | -                | -             | -                | -             | -                |
| Cerebral infarction           | 2.9 (1.4-5.8) | <b>0.004</b>     | -             | -                | -             | -                | 1.9 (0.9-3.8) | 0.07             |
| Respiratory                   |               |                  |               |                  |               |                  |               |                  |
| Chronic bronchitis            | 1.1 (0.4-2.5) | 0.55             | -             | -                | -             | -                | -             | -                |
| COPD                          | 2.6 (1.2-5.6) | <b>0.01</b>      | -             | -                | -             | -                | 1.9 (0.9-3.9) | 0.10             |
| Endocrine                     |               |                  |               |                  |               |                  |               |                  |
| Diabetes                      | 1.1 (0.7-1.9) | 0.61             | -             | -                | -             | -                | -             | -                |
| Others                        |               |                  |               |                  |               |                  |               |                  |
| Renal failure                 | 2.3 (0.9-6.0) | 0.09             | -             | -                | -             | -                | 2.0 (0.8-5.1) | 0.13             |
| History of surgery            | 1.7 (0.6-5.1) | 0.34             | -             | -                | -             | -                | -             | -                |

HR=hazard ratio;

CHD=coronary heart disease;

COPD=chronic obstructive pulmonary disease;

Bold: statistically significant using threshold  $p < 0.05$ .

The increasing number of cumulative comorbidities was associated with higher mortality risk in both unadjusted and adjusted models ( $p < 0.001$ ). Moreover, one additional pre-existing comorbidity was associated with a 40% increased risk in mortality of COVID-19. All pre-existing comorbidities were associated with a higher risk of COVID-19 mortality in the univariate model, of which CHD had the largest hazard ratio (HR) of 4.2 ( $p < 0.001$ ), followed by cerebral infarction (HR=2.9,  $p=0.004$ ), COPD (HR=2.6,  $p=0.01$ ), renal failure (HR=2.3,  $p=0.09$ ), cardiac failure (HR=1.9,  $p=0.1$ ), history of surgery (HR=1.7,  $p=0.34$ ), hypertension (HR=1.4,  $p=0.17$ ), diabetes (HR=1.1,  $p=0.61$ ) and chronic bronchitis (HR=1.1,  $p=0.55$ ). After adjusting for age, gender, and early period of pandemic in China, CHD was the only comorbidity that yielded a significant death risk: COVID-19 patients with pre-existing CHD had an estimated 2.9 times death risk of those without CHD. In addition, cerebral infarction, COPD, and renal failure all had

1  
2  
3 an estimated HR of around 2.0, respectively. Similar results were observed by using unweighted  
4 logistic regression in a sensitivity analysis (Supplementary Table S2).

5  
6 The overall median follow-up was 40 days, during which 94 deaths were observed.  
7  
8 Figure 2 shows the estimated survival probability over 70 days for an example patient profile  
9 with and without CHD (65-year-old female with no other comorbidities). For such patient  
10 profile, having pre-existing CHD led to a significantly shorter survival probability over time,  
11 compared to those without CHD ( $p < 0.001$ ). For those with CHD, the estimated 30-day survival  
12 probability was 0.53 (95% CI [0.34-0.82]), with an estimated 34 days' median survival time. On  
13 the other hand, the estimated 30-day probability was 0.85 (95% CI [0.79-0.91]) for those without  
14 CHD, with the corresponding median survival time over 70 days.

## 21 Discussion

22  
23 In this paper, we used survival analysis to estimate the fatal risk of pre-existing  
24 comorbidities in COVID-19, based on publicly reported confirmed cases and adjusted for the  
25 confounding effect of age, gender, and early period of the pandemic when no-intervention was  
26 taken. There were three major findings: First, a history of comorbidities significantly increased  
27 the death risk of COVID-19: one additional pre-existing comorbidity led to an estimated 40%  
28 increase of death risk ( $p < 0.001$ ). Second, after adjusting for confounders, CHD was the only  
29 significant risk factor for COVID-19 mortality. Patients with CHD had a 200% higher risk of  
30 mortality in COVID-19, compared to patients without CHD ( $p < 0.001$ ). For a patient profile (65-  
31 year-old female without other comorbidities), the estimated median survival times for those with  
32 CHD was 34 days, while it was over 70 days for those without CHD ( $p < 0.001$ ). Third, older age  
33 was associated with increased death risk. Specifically, every 5-year increase in age was  
34 associated with a 20% increased risk of mortality ( $p < 0.001$ ).

35  
36 To our best knowledge, the present study is the first to provide substantial statistical  
37 evidence to show the effect of CHD in predicting mortality for COVID-19. This result is  
38 consistent with previous studies that found higher case-fatality rate among patients with  
39 cardiovascular disease [9, 15]. It is worth pointing out that the existing studies [9, 16] that  
40 investigate prognostic factors for death used chi-square tests or univariate logistic regression that  
41 does not control for potential confounders. In contrast, by conducting weighted Cox proportional  
42 hazard regression models, our study used time-to-event outcomes, which offers more survival-  
43  
44  
45  
46  
47  
48  
49  
50  
51  
52  
53  
54  
55  
56  
57  
58  
59  
60

1  
2  
3 time-related information to help guide the clinical intervention and more statistical power to  
4 detect risk factors [33-34].

5  
6 Previous studies have indicated that cardiovascular events following pneumonia may  
7 increase the risk of mortality [35-41], which explained our findings from the point view of  
8 pathophysiological mechanisms. One potential mechanism underlying the association between  
9 pneumonia and cardiovascular events is inflammation [38]. Specifically, the inflammatory  
10 reaction following pneumonia can result in plaque instability and damage in the blood vessels,  
11 where evidence of elevated local inflammation in the atherosclerotic coronary arteries following  
12 acute systemic infections have been shown in many studies [38, 40]. Thus, infections may result  
13 in heightened loading imposed on cardiomyocytes, and lead to sympathetic hyperactivity,  
14 ischemia, which may increase the risk of arrhythmia and heart failure in COVID-19 patients with  
15 pre-existing CHD [37].

16  
17 From the clinical point of view, early evaluation of patient medical history is necessary to  
18 implement early medical interventions and decrease the mortality risk. We suggest monitoring  
19 the dynamic heart rate for patients with pre-existing CHD. For those severe-symptomatic  
20 patients who had pre-existing heart ischemia and abnormal heart function, early medical  
21 intervention may be needed [41]. Furthermore, our results indicated that the hazard of COVID-  
22 19 death was significantly higher in patients at older ages. Adjusting for others, every 5-year  
23 increase in age was associated with a 22% increased risk of death, similarly to what was found in  
24 previous studies [8, 9, 16]. Alongside the evidence of prognostic risk in CHD, we suggest that  
25 extra care is needed for those with CHD, especially for elderly patients.

26  
27 The design of excluding patients from Hubei Province was based on the concerns of  
28 unknown confounders caused by insufficient medical resources in the epicenter. CDC's report  
29 has pointed out that the rapidly increasing number of infections could easily crash the health care  
30 system by exceeding its maximum capacity [42]. Therefore, analyzing patient data outside of  
31 Hubei Province can avoid the competing death risk caused by insufficient health care resources,  
32 and reveal the true underlying impact of pre-existing comorbidities on COVID-19 mortality [44].

33  
34 One limitation of the present study lies in the nature of publicly reported data.  
35 Researchers have pointed out that severe cases may be over-represented in publicly reported data  
36 [45]. Nevertheless, we have managed to reduce the potential bias caused by severe case over-  
37 representation, through the appropriate matching between cases and controls in NCC design. The

1  
2  
3 auto-matching procedure via statistical program also prevented the possibility of tendentiously  
4 selecting survivors with comorbidity-free history during data collection. Since NCC design is  
5 favored in our situation where the risk factor data and event of interest can be identified  
6 opportunistically from publicly reported confirmed cases [30], NCC was the optimal choice,  
7 given the restricted availability of public data.  
8  
9

10  
11  
12 Given the limited understanding of the prognostic factors for COVID-19, more research,  
13 potentially prospective studies, are needed to investigate the mechanism by which pre-existing  
14 CHD may influence the survival probability among patients with COVID-19. In addition, further  
15 investigation is suggested on the association between comorbidity-related clinical index and  
16 mortality based on patient clinical test results.  
17  
18

19  
20 In conclusion, our findings provided preliminary yet strong evidence supporting the  
21 association between pre-existing CHD and mortality risk for patients with COVID-19. Based on  
22 our findings, close monitoring, extra care, and early medical intervention are needed for patients  
23 with pre-existing CHD, to reduce the mortality risk associated with COVID-19.  
24  
25  
26

## 27 28 **Footnotes**

### 29 30 **Author Contributions**

31  
32 TG conducted the analysis, interpreted the data, drafted the article and rechecked the  
33 transcribed manuscript. QC conducted literature review and drafted the article. ZY guided and  
34 supervised the statistical analysis. BF helped with data analysis. AL helped data collection,  
35 management, and quality check. LX provided clinical support and interpretation of the results.  
36 RW collected, pre-processed and managed data, and conducted preliminary data analysis. YH  
37 guided and supervised the research process, and provided funding support. All authors critically  
38 revised the manuscript for intellectual content, approved the final draft, and agree to  
39 accountability for all aspects of the work.  
40  
41  
42  
43  
44  
45  
46

### 47 48 **Conflict of Interest**

49  
50 The authors have no affiliations with or involvement in any organization or entity with  
51 any financial or non-financial interest in the subject matter or materials discussed in this  
52 manuscript.  
53  
54  
55  
56  
57  
58  
59



## Ethics Approval

The study was approved by Shanghai Jiao Tong University Public Health and Nursing Medical Research Ethics Committee (SJUPN-202001).

## Patient and Public Involvement

This study used publicly reported patient-level data. All data were available online to the public. No patient recruitment was involved in the study design, and no personal information can be identified from the data.

## Funding

This project was funded by the National Natural Science Foundation of China (No. 71874111), Shanghai Municipal Health Bureau Foundation (No. 201740116) and Shanghai Jiao Tong University Scientific and Technological Innovation Funds (YG2020YQ01, YG2020YQ06).

## Data sharing statement

Raw data is available at [https://github.com/GuTian-TianGu/COVID-19\\_NCCstudy.git](https://github.com/GuTian-TianGu/COVID-19_NCCstudy.git).

## Word count

3220

## Reference

- [1] Coronavirus disease 2019 (COVID-19) Situation Report – 62. [https://www.who.int/docs/default-source/coronaviruse/situation-reports/20200322-sitrep-62-covid-19.pdf?sfvrsn=f7764c46\\_2](https://www.who.int/docs/default-source/coronaviruse/situation-reports/20200322-sitrep-62-covid-19.pdf?sfvrsn=f7764c46_2)
- [2] Lu R., Zhao X., Li J, et al. Genomic characterisation and epidemiology of 2019 novel coronavirus: implications for virus origins and receptor binding. *Lancet* 2020; **395**: 565-74.
- [3] Huang C, Wang Y, Li X, et al. Clinical features of patients infected with 2019 novel coronavirus in Wuhan, China. *Lancet* 2020; **395**: 497-506.

- 1  
2  
3 [4] Chen N, Zhou M, Dong X, et al. Epidemiological and clinical characteristics of 99 cases of  
4 2019 novel coronavirus pneumonia in Wuhan, China: a descriptive study. *Lancet* 2020; **395**:  
5 507-13.  
6  
7  
8 [5] Xu X, Wu X, Gao J, et al. Clinical findings in a group of patients infected with the 2019  
9 novel coronavirus (SARS-Cov-2) outside of Wuhan, China: retrospective case series. *BMJ*  
10 2020; **368**: m606.  
11  
12  
13 [6] Wang D, Hu B, Hu C *et al.* Clinical characteristics of 138 hospitalized patients with 2019  
14 novel coronavirus–infected pneumonia in Wuhan, China. *JAMA* 2020; **323**: 1061–1069.  
15  
16  
17 [7] Zhang J-J, Dong X, Cao Y-Y et al. Clinical characteristics of 140 patients infected with  
18 SARS-CoV-2 in Wuhan, China. *Allergy* 2020; **00**: 1– 12.  
19  
20  
21 [8] Guan WJ, Ni ZY, Hu Y, et al. Clinical characteristics of coronavirus disease 2019 in  
22 China. *N Engl J Med* 2020. [Epub ahead of print].  
23  
24  
25  
26 [9] Wu Z, McGoogan JM. Characteristics of and important lessons from the coronavirus  
27 disease 2019 (COVID-19) outbreak in China: summary of a report of 72314 cases from the  
28 Chinese Center for Disease Control and Prevention. *JAMA* 2020. [Epub ahead of print].  
29  
30  
31 [10] Ruan Q, Yang K, Wang W, Jiang L, Song J. Clinical predictors of mortality due to COVID-19  
32 based on an analysis of data of 150 patients from Wuhan, China. *Intensive Care Med* 2020.  
33 [Epub ahead of print].  
34  
35  
36 [11] Shi S, Qin M, Shen Bo, et al. Association of Cardiac Injury with Mortality in Hospitalized  
37 Patients With COVID-19 in Wuhan, China. *JAMA Cardiol* 2020. [Epub ahead of print].  
38  
39  
40 [12] Liu J, Tu C, Zhu M, et al, Exploring the Law of Development and Prognostic Factors of  
41 Common and Severe COVID-19: A Retrospective Case-Control Study in 122 Patients with  
42 Complete Course of Disease. *Lancet* 2020 [Epub ahead of print].  
43  
44  
45 [13] Liang W, Guan W, Chen R, *et al.* Cancer patients in SARS-CoV-2 infection: a nationwide  
46 analysis in China. *The Lancet Oncology*.2020; **21**: 335-7.  
47  
48  
49 [14] Mao R, Liang J, Shen J, *et al.* Implications of COVID-19 for patients with pre-existing  
50 digestive diseases. *The lancet Gastroenterology & hepatology* 2020. [Epub ahead of print].  
51  
52  
53 [15] Deng SQ, Peng HJ. Characteristics of and public health responses to the coronavirus disease  
54 2019 outbreak in China. *J Clin Med* 2020; **9**: 575.  
55  
56  
57  
58  
59  
60

- 1  
2  
3  
4  
5 [16] Zhou F, Yu T, Du R, *et al*. Clinical course and risk factors for mortality of adult inpatients  
6 with COVID-19 in Wuhan, China: a retrospective cohort study. *Lancet* 2020. [Epub ahead  
7 of print]  
8  
9  
10 [17] Appelros P, Stegmayr B, Terent A. Sex differences in stroke epidemiology: a systematic  
11 review, *Stroke* 2009; **40**: 1082-90.  
12  
13 [18] Camp P G , Goring S M . Gender and the diagnosis, management, and surveillance of  
14 chronic obstructive pulmonary disease. *Ann AmThorac Soc* 2007; **4**: 686-691.  
15  
16 [19] Tchkonja T, Kirkland JL. Aging, cell senescence, and chronic disease: emerging therapeutic  
17 strategies. *JAMA* 2018; **320**: 1319–20.  
18  
19 [20] Prasad S, Sung B, Aggarwal BB. Age-associated chronic diseases require age-old medicine:  
20 Role of chronic inflammation. *Prev Med* 2012; **54**: S29-S37.  
21  
22 [21] Chinese COVID-19 Outbreak Distribution System. Available at  
23 <http://2019ncov.chinacdc.cn/2019-nCoV/>  
24  
25  
26 [22] Wang C, Li L, Hao X, *et al*. Evolving Epidemiology and Impact of Non-pharmaceutical  
27 Interventions on the Outbreak of Coronavirus Disease 2019 in Wuhan, China. [MedRxiv  
28 ahead of print]  
29  
30 [23] Azoulay L, Dell'Aniello S, Gagnon B, *et al*. Metformin and Incidence of Prostate Cancer in  
31 Patients with Type 2 Diabetes. *Cancer Epidemiol Biomarkers Prev* 2011; **20**: 337–344.  
32  
33 [24] Schlienger RG, Fedson DS, Jick SS, *et al*. Statins and the risk of pneumonia: a population-  
34 based, nested case-control study. *Pharmacotherapy* 2007; **27**: 325–332.  
35  
36 [25] Lipscombe LL, Levesque LE, Gruneir A, *et al*. Antipsychotic drugs and the risk of  
37 hyperglycemia in older adults without diabetes: a population-based observational study. *Am*  
38 *J Geriatr Psychiatry* 2011; **19**: 1026-1033.  
39  
40 [26] Lipscombe LL, Gomes T, Levesque LE, *et al*. Thiazolidinediones and cardiovascular  
41 outcomes in older patients with diabetes. *J Am Med Assoc* 2007; **298**: 2634–2643.  
42  
43 [27] Levesque LE, Brophy JM, Zhang B. The risk for myocardial infarction with  
44 cyclooxygenase-2 inhibitors: a population study of elderly adults. *Ann Intern Med* 2005;  
45 **142**: 481–489.  
46  
47  
48  
49  
50  
51  
52  
53  
54  
55  
56  
57  
58  
59  
60

- 1  
2  
3  
4  
5 [28] Cerfolio RJ, Bryant AS. Survival and outcomes of pulmonary resection for non-small cell  
6 lung cancer in the elderly: A nested case-control study. *Ann Thorac Surg* 2006; **82**: 424-430.  
7
- 8 [29] Khandaker G, Rashid H, Zurynski Y, *et al.* Nosocomial vs community-acquired pandemic  
9 influenza A (H1N1) 2009: a nested case-control study. *J Hosp Infect* 2012; **82**:94–100.  
10  
11
- 12 [30] Langholz, B. and Clayton, D. Sampling Strategies in Nested Case-Control  
13 Studies. *Environ Health Persp* 1994; **102**: 47–51.  
14  
15
- 16 [31] Stoer N and Samuelsen S. multipleNCC. Weighted Cox-Regression for Nested Case-Control  
17 Data. R package version 1.2-2.2020. Available at [https://CRAN.R-](https://CRAN.R-project.org/package=multipleNCC)  
18 [project.org/package=multipleNCC](https://CRAN.R-project.org/package=multipleNCC)  
19  
20
- 21 [32] Stoer N and Samuelsen S. Inverse probability weighting in nested case-control studies with  
22 additional matching - a simulation study. *Stat Med* 2013;**32**, 5328-5339.  
23  
24
- 25 [33] George B, Seals S and Aban I. Survival analysis and regression models. *J NuclCardiol* 2014;  
26 **21**: 686–694.  
27  
28
- 29 [34] Annesi I, Moreau T and Lellouch J. Efficiency of the logistic regression and Cox  
30 proportional hazards models in longitudinal studies. *Stat Med* 1989; **8**: 1515–1521.  
31  
32
- 33 [35] Chen N, Zhou M, Dong X, *et al.* Epidemiological and clinical characteristics of 99 cases of  
34 2019 novel coronavirus pneumonia in Wuhan, China: a descriptive study. *Lancet* 2020; **395**:  
35 507-13.  
36  
37
- 38 [36] Tralhão A and Póvoa P. Cardiovascular Events After Community-Acquired Pneumonia: A  
39 Global Perspective with Systematic Review and Meta-Analysis of Observational Studies, *J*  
40 *Clin Med* 2020, **9**: 414.  
41  
42
- 43 [37] Kirchhof P, Benussi S, Kotecha D, *et al.* 2016 ESC Guidelines for the management of atrial  
44 fibrillation developed in collaboration with EACTS. *Eur. Heart J* 2016; **37**: 2893–2962.  
45  
46
- 47 [38] Libby P. Mechanisms of Acute Coronary Syndromes and Their Implications for Therapy. *N.*  
48 *Engl. J. Med* 2013; **368**: 2004–2013  
49  
50
- 51 [39] Madjid M, Vela D, Khalili-Tabrizi H, *et al.* Systemic infections cause exaggerated local  
52 inflammation in atherosclerotic coronary arteries: Clues to the triggering effect of acute  
53 infections on acute coronary syndromes. *Tex. Heart Inst. J* 2007, **34**:11–18.  
54  
55  
56  
57  
58  
59  
60

- 1  
2  
3 [40]Mauriello A, Sangiorgi G, Fratoni S, et al. Diffuse and Active Inflammation Occurs in Both  
4 Vulnerable and Stable Plaques of the Entire Coronary Tree A Histopathologic Study of  
5 Patients Dying of Acute Myocardial Infarction. *J Am Coll Cardiol* 2005; **45**: 1585–1593.  
6  
7  
8 [41]Zhu J, Zhang X, Shi G, et al. Atrial fibrillation is an independent risk factor for hospital-  
9 acquired pneumonia. *PLoS ONE*. 2015; **10**: e0131782.  
10  
11  
12 [42]Corrales-Medina VF, Musher DM, Shachkina S, et al. Acute pneumonia and the  
13 cardiovascular system. *Lancet* 2013; **381**: 496-505.  
14  
15  
16 [43]Qualls N, Levitt A, Kanade N, et al. Community mitigation guidelines to prevent pandemic  
17 influenza - United States, 2017. *MMWR Recomm Rep*. 2017; **66**: 1–34.  
18  
19  
20 [44]Ji Y, Ma Z, Peppelenbosch MP, et al. Potential association between COVID-19 mortality  
21 and health-care resource availability. *Lancet Glob Health*. 2020. [Epub ahead of print].  
22  
23  
24 [45]Lauer SA, Grantz KH, Bi Q, et al. The Incubation Period of Coronavirus Disease 2019  
25 (COVID-19) From Publicly Reported Confirmed Cases: Estimation and Application. *Ann*  
26 *Intern Med* 2020. [Epub ahead of print].  
27  
28  
29  
30  
31  
32  
33  
34  
35  
36  
37  
38  
39  
40  
41  
42  
43  
44  
45  
46  
47  
48  
49  
50  
51  
52  
53  
54  
55  
56  
57  
58  
59  
60

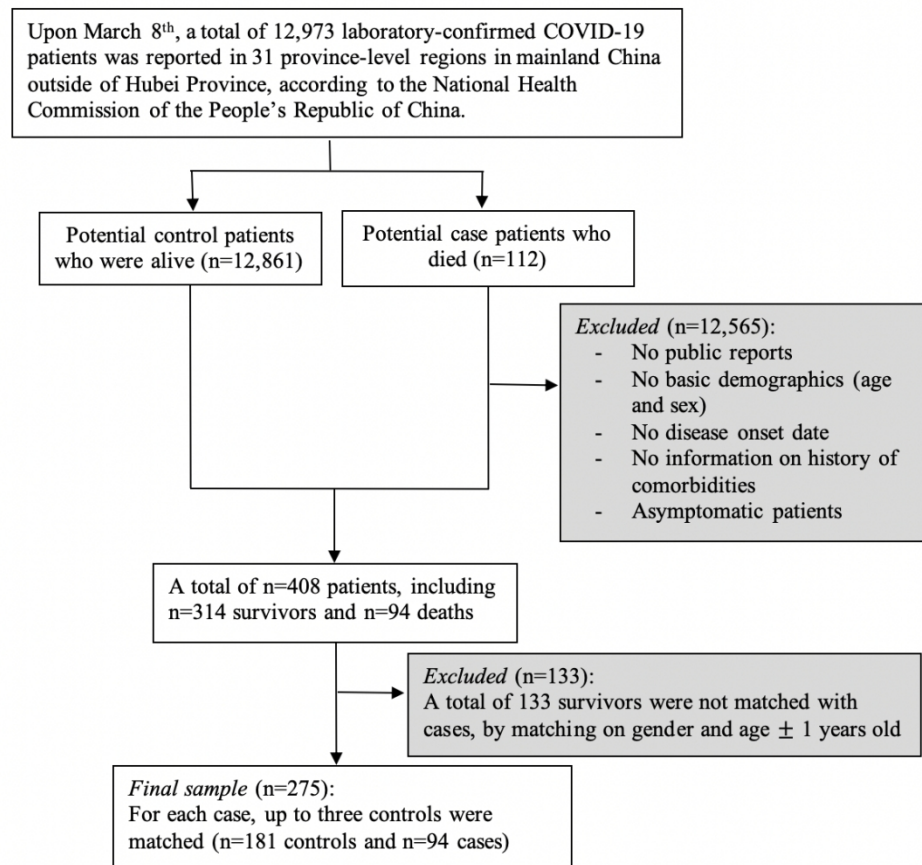

Figure 1: Patient flow diagram detailing included subjects and exclusion criteria

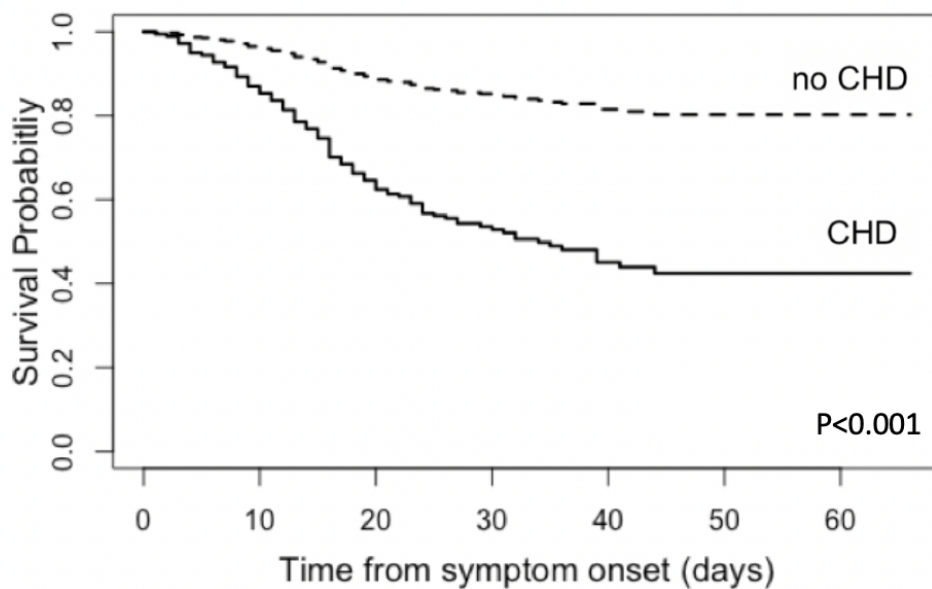

Figure 2: Estimated survival probability over time from the adjusted Cox proportional hazard model for an example patient profile (65-year-old female without CHD [dashed line] or with CHD [solid line], who had no other comorbidities). The estimated 30-day survival probability was 0.53 (95% CI [0.34-0.82]) for patients with pre-existing CHD, while 0.85 (95% CI [0.79-0.91]) for those without ( $p<0.001$ ). CHD=coronary heart disease.

**Supplementary Table S1.** Sample distribution across all 32 province-level in mainland China

| Province     | Survivors        |              | Deaths           |              |
|--------------|------------------|--------------|------------------|--------------|
|              | National total n | Sample n (%) | National total n | Sample n (%) |
| Guangdong    | 1343             | 9 (0.67)     | 8                | 8 (100.00)   |
| Henan        | 1265             | 7 (0.55)     | 22               | 17 (77.30)   |
| Zhejiang     | 1205             | 10 (0.83)    | 1                | 1 (100.00)   |
| Hunan        | 1003             | 15 (1.50)    | 4                | 2 (50.00)    |
| Anhui        | 981              | 9 (0.92)     | 6                | 6 (100.00)   |
| Jiangxi      | 932              | 3 (0.32)     | 1                | 1 (100.00)   |
| Shandong     | 692              | 66 (9.54)    | 6                | 6 (100.00)   |
| Jiangsu      | 618              | 13 (2.10)    | 0                | 0 (100.00)   |
| Chongqing    | 576              | 0 (0.00)     | 6                | 6 (100.00)   |
| Sichuan      | 535              | 4 (0.75)     | 3                | 3 (100.00)   |
| Heilongjiang | 475              | 6 (1.26)     | 13               | 9 (69.20)    |
| Beijing      | 425              | 3 (0.71)     | 8                | 3 (37.50)    |
| Shanghai     | 339              | 3 (0.88)     | 3                | 3 (100.00)   |
| Hebei        | 312              | 6 (1.92)     | 6                | 6 (100.00)   |
| Fujian       | 294              | 2 (0.68)     | 1                | 1 (100.00)   |
| Guangxi      | 250              | 2 (0.80)     | 2                | 2 (100.00)   |
| Shaanxi      | 239              | 6 (2.51)     | 1                | 1 (100.00)   |
| Yunnan       | 171              | 3 (1.75)     | 2                | 1 (50.00)    |
| Hainan       | 163              | 5 (3.07)     | 6                | 6 (100.00)   |
| Guizhou      | 144              | 2 (1.39)     | 2                | 2 (100.00)   |
| Tianjin      | 132              | 4 (3.03)     | 3                | 3 (100.00)   |
| Shanxi       | 131              | 2 (1.53)     | 0                | 0 (100.00)   |
| Liaoning     | 125              | 0 (0.00)     | 1                | 0 (0.00)     |
| Gansu        | 123              | 1 (0.81)     | 2                | 2 (100.00)   |
| Jilin        | 92               | 1 (1.09)     | 1                | 1 (100.00)   |
| Xinjiang     | 76               | 0 (0.00)     | 3                | 3 (100.00)   |
| Neimenggu    | 73               | 2 (2.74)     | 1                | 1 (100.00)   |
| Ningxia      | 75               | 0 (0.00)     | 0                | 0 (100.00)   |
| Hubei*       | NA               | NA           | NA               | NA           |
| Total        | 12698            | 275 (2.17)   | 112              | 94 (83.9)    |

\*Hubei Province was excluded from this study



**Supplementary Table S2: Results from unweighted logistic regression**

|                               | Multivariate  |                  |               |              |               |              |
|-------------------------------|---------------|------------------|---------------|--------------|---------------|--------------|
|                               | OR (95% CI)   | P Value          | OR (95% CI)   | P Value      | OR (95% CI)   | P Value      |
| Age                           | 1.0 (1.0-1.1) | <b>0.03</b>      | 1.0 (1.0-1.1) | <b>0.007</b> | 1.0 (1.0-1.1) | <b>0.05</b>  |
| Male                          | 1.1 (0.6-1.7) | 0.98             | 1.1 (0.6-1.8) | 0.87         | 1.0 (0.5-1.7) | 0.89         |
| Before 01/11/2020             | 1.7 (0.9-3.1) | 0.09             | 1.6 (0.9-2.9) | 0.12         | 1.7 (0.9-3.1) | 0.09         |
| Total number of comorbidities | 1.2 (1.2-1.8) | <b>&lt;0.001</b> |               |              |               |              |
| CHD                           |               |                  | 3.3 (1.6-6.9) | <b>0.002</b> | 3.4 (1.7-7.4) | <b>0.001</b> |
| Cerebral infarction           |               |                  |               |              | 2.5 (0.9-7.0) | 0.08         |
| COPD                          |               |                  |               |              | 2.5 (0.7-9.4) | 0.14         |
| Renal failure                 |               |                  |               |              | 1.9 (0.5-7.0) | 0.30         |

OR=odds ratio; CHD=coronary heart disease; COPD=chronic obstructive pulmonary disease.

Bold: statistically significant using threshold  $p < 0.05$

# BMJ Open

## History of coronary heart disease increased the mortality rate of COVID-19 patients: a nested case-control study

|                                 |                                                                                                                                                                                                                                                                                                                                                                                                                                                                                                                                                                                                                                                                                                                                    |
|---------------------------------|------------------------------------------------------------------------------------------------------------------------------------------------------------------------------------------------------------------------------------------------------------------------------------------------------------------------------------------------------------------------------------------------------------------------------------------------------------------------------------------------------------------------------------------------------------------------------------------------------------------------------------------------------------------------------------------------------------------------------------|
| Journal:                        | <i>BMJ Open</i>                                                                                                                                                                                                                                                                                                                                                                                                                                                                                                                                                                                                                                                                                                                    |
| Manuscript ID                   | bmjopen-2020-038976.R1                                                                                                                                                                                                                                                                                                                                                                                                                                                                                                                                                                                                                                                                                                             |
| Article Type:                   | Original research                                                                                                                                                                                                                                                                                                                                                                                                                                                                                                                                                                                                                                                                                                                  |
| Date Submitted by the Author:   | 19-Jun-2020                                                                                                                                                                                                                                                                                                                                                                                                                                                                                                                                                                                                                                                                                                                        |
| Complete List of Authors:       | Gu, Tian; University of Michigan, Biostatistics<br>Chu, Qiao; Shanghai Jiao Tong University School of Medicine, School of Public Health<br>Zhang-Sheng, Yu; Shanghai Jiao Tong University, Department of Bioinformatics and Biostatistics<br>Fa, Botao; Shanghai Jiao Tong University, Department of Bioinformatics and Biostatistics<br>Li, Anqi; East China Normal University, School of Social Development<br>Xu, Lei; Shanghai Chest Hospital, Department of Cardiology; Shanghai Jiao Tong University<br>Wu, Ruijun; East China Normal University, School of Social Development<br>He, Yaping; Shanghai Jiao Tong University, School of Public Health; Shanghai Jiao Tong University, Center for Health Technology Assessment |
| <b>Primary Subject Heading</b>: | Infectious diseases                                                                                                                                                                                                                                                                                                                                                                                                                                                                                                                                                                                                                                                                                                                |
| Secondary Subject Heading:      | Epidemiology, Public health                                                                                                                                                                                                                                                                                                                                                                                                                                                                                                                                                                                                                                                                                                        |
| Keywords:                       | Epidemiology < INFECTIOUS DISEASES, Coronary heart disease < CARDIOLOGY, Public health < INFECTIOUS DISEASES                                                                                                                                                                                                                                                                                                                                                                                                                                                                                                                                                                                                                       |
|                                 |                                                                                                                                                                                                                                                                                                                                                                                                                                                                                                                                                                                                                                                                                                                                    |

SCHOLARONE™  
Manuscripts



I, the Submitting Author has the right to grant and does grant on behalf of all authors of the Work (as defined in the below author licence), an exclusive licence and/or a non-exclusive licence for contributions from authors who are: i) UK Crown employees; ii) where BMJ has agreed a CC-BY licence shall apply, and/or iii) in accordance with the terms applicable for US Federal Government officers or employees acting as part of their official duties; on a worldwide, perpetual, irrevocable, royalty-free basis to BMJ Publishing Group Ltd ("BMJ") its licensees and where the relevant Journal is co-owned by BMJ to the co-owners of the Journal, to publish the Work in this journal and any other BMJ products and to exploit all rights, as set out in our [licence](#).

The Submitting Author accepts and understands that any supply made under these terms is made by BMJ to the Submitting Author unless you are acting as an employee on behalf of your employer or a postgraduate student of an affiliated institution which is paying any applicable article publishing charge ("APC") for Open Access articles. Where the Submitting Author wishes to make the Work available on an Open Access basis (and intends to pay the relevant APC), the terms of reuse of such Open Access shall be governed by a Creative Commons licence – details of these licences and which [Creative Commons](#) licence will apply to this Work are set out in our licence referred to above.

Other than as permitted in any relevant BMJ Author's Self Archiving Policies, I confirm this Work has not been accepted for publication elsewhere, is not being considered for publication elsewhere and does not duplicate material already published. I confirm all authors consent to publication of this Work and authorise the granting of this licence.

# History of coronary heart disease increased the mortality rate of COVID-19 patients: a nested case-control study

Tian Gu, MS<sup>1</sup>; Qiao Chu, PhD<sup>2</sup>; Zhangsheng Yu, PhD<sup>3</sup>; Botao Fa, MS<sup>3</sup>; Anqi Li, MS<sup>4</sup>; Lei Xu, MD<sup>5</sup>; Ruijun Wu, PhD<sup>4</sup>; Yaping He, PhD<sup>2</sup>

## Author affiliations:

1. Department of Biostatistics, School of Public Health, University of Michigan, Ann Arbor, MI, USA
2. School of Public Health, Shanghai Jiao Tong University School of Medicine, Shanghai, China
3. Department of Bioinformatics and Biostatistics, Shanghai Jiao Tong University, Shanghai, China
4. School of Social Development, East China Normal University, Shanghai, China
5. Department of Cardiology, Shanghai Chest Hospital, Shanghai Jiao Tong University, Shanghai, China

## Corresponding authors:

Prof. Ruijun Wu: School of Social Development, East China Normal University, 500 Dongchuan Rd., Shanghai 200241, China ([rjwu@re.ecnu.edu.cn](mailto:rjwu@re.ecnu.edu.cn)).

Prof. Yaping He: College of Public Health, Shanghai Jiao Tong University School of Medicine, South Chongqing Rd., No. 227, Shanghai 200025, China ([hypecyr@sina.com](mailto:hypcyr@sina.com)).

## 28 Abstract

29 **Objective:** Evaluate the risk of pre-existing comorbidities on COVID-19 mortality, and provide  
30 clinical suggestions accordingly.

31 **Setting:** A nested case-control design using confirmed cases reports released from news or  
32 national/provincial/municipal health commission of China between December 18<sup>th</sup>, 2019 and  
33 March 8<sup>th</sup>, 2020.

34 **Participants:** Patients with confirmed SARS-CoV-2 infection in mainland China outside of  
35 Hubei Province, excluding asymptomatic patients.

36 **Outcome measures:** Patient demographics, survival time and status, and history of  
37 comorbidities.

38 **Method:** A total of 94 publicly reported deaths in locations outside of Hubei Province, mainland  
39 China, between December 18<sup>th</sup>, 2019 and March 8<sup>th</sup>, 2020 were included as cases. Each case was  
40 matched with up to three controls, based on gender and age  $\pm$  1 year old (94 cases and 181  
41 controls). The inverse probability-weighted Cox proportional hazard model was performed,  
42 controlling for age, gender, and early period of the outbreak.

43 **Results:** Of the 94 cases, the median age was 72.5 years old (IQR=16), and 59.6% were male,  
44 while in the control group the median age was 67 years old (IQR=22) and 64.6% were male.  
45 Adjusting for age, gender, and early period of outbreak, poor health conditions were associated  
46 with a higher risk of COVID-19 mortality (HR of comorbidity score, 1.31 [95% CI: 1.11-1.54];  
47  $p=0.001$ ). The estimated mortality risk in patients with pre-existing CHD was three times of  
48 those without CHD ( $p<0.001$ ). The estimated 30-day survival probability for a profile patient  
49 with pre-existing CHD (65-year-old female with no other comorbidities) was 0.53 (95% CI,  
50 0.34-0.82), while it was 0.85 (95% CI, 0.79-0.91) for those without CHD. Older age was also  
51 associated with increased death risk: every 1-year increase in age was associated with a 4%  
52 increased risk of mortality ( $p<0.001$ ).

53 **Conclusion:** Extra care and early medical interventions are needed for patients with pre-existing  
54 comorbidities, especially CHD.

## 59 **Strengths and limitations of this study**

60 (i) Using data outside of the epicenter of the outbreak in mainland China avoided the competing  
61 death risk caused by insufficient health care resources; (ii) the study controlled for the  
62 confounding effects of age, gender and early period of pandemic, which were in general not  
63 considered in the existing literatures; (iii) the survival-time-related statistical results can help  
64 guide the early clinical intervention to reduce the mortality; (iv) Lacking medical test results in  
65 the publicly reported data restricted further investigation on the association between  
66 comorbidity-related clinical index and mortality; (v) missing at random assumption could not be  
67 verified.

## 69 **Introduction**

70 Since the first report of Coronavirus Disease 2019 (COVID-19) in December 2019 in  
71 Wuhan, Hubei Province, China, the novel virus infection has rapidly spread to other cities in  
72 China, and has now been detected in 186 countries and locations internationally [1]. On March  
73 11<sup>th</sup>, 2020, the World Health Organization declared COVID-19 a pandemic, and has called for  
74 aggressive actions from all countries to fight the disease. Current research has indicated that  
75 COVID-19 is caused by severe acute respiratory syndrome coronavirus 2 (SARS-CoV-2), a beta-  
76 coronavirus similar to the severe acute respiratory syndrome-coronavirus (SARS-CoV) in the  
77 genetic sequence [2]. Epidemiological evidence suggests that initially reported cases in China  
78 had a history of exposure to the Huanan seafood market [3]-[4]. With the escalated spread of the  
79 infection, there has been clear evidence of human to human transmission[5]-[6]. The most  
80 common symptoms include fever, dry cough and fatigue [5]-[8], with presence of asymptomatic,  
81 yet contagious cases [9].

82 According to the COVID-19 situation reports of WHO, as of June 13<sup>th</sup>, 2020, the  
83 infection has caused 83,132 confirmed cases in mainland China, including 4,634 deaths.  
84 Internationally, a total of 7.41 million confirmed cases have been reported from 186 countries  
85 outside of China, including 418,000 deaths. Considering the global public health threat posed by  
86 COVID-19, unraveling the prognostic factors for patients, especially the risk factors of mortality  
87 associated with COVID-19, has important implications for clinical practice and is urgently  
88 warranted.

1  
2  
3 89 Studies have indicated that severe cases tend to be older in age [6], [8] and are more  
4  
5 90 likely to have had pre-existing medical conditions, including but not limited to hypertension [3],  
6  
7 91 [6], [8], diabetes [6] [8], cardiovascular diseases [3], [6], [8], [10]-[12], cerebrovascular diseases  
8  
9 92 [6], chronic obstructive pulmonary disease (COPD) [3], [8], cancer [13], and digestive diseases  
10  
11 93 [14], in comparison to non-severe cases [3], [6], [8]-[15].

12 94 Recently, scholarly attention focuses on identifying the risk factors for death from  
13  
14 95 COVID-19. Some evidence suggests that pre-existing medical conditions are likely death risk  
15  
16 96 factors for COVID-19. For example, a study based on 72,314 cases in China indicated that the  
17  
18 97 case-fatality rate (CFR) tends to be higher among those with older age, and having pre-existing  
19  
20 98 cardiovascular disease, diabetes, and hypertension compared to all the patients [9]. Similarly, by  
21  
22 99 conducting logistic regression on odds of in-hospital death among 54 diseased patients and 137  
23  
24 100 recovered patients in Wuhan City, Hubei Province, Zhou et al. [16] found that older age, higher  
25  
26 101 Sequential Organ Failure Assessment (SOFA) score and d-dimer greater than 1ug/ml at hospital  
27  
28 102 admission were associated with increased odds of in-hospital death. Chen et al. (2020) found that  
29  
30 103 pre-existing hypertension and other cardiovascular complications were more common among  
31  
32 104 diseased patients than recovered patients (unpublished data).

33  
34 105 However, several gaps remain in the understanding of risk factors for mortality of  
35  
36 106 COVID-19. First, most current research on pre-existing comorbidities of COVID-19 was based  
37  
38 107 on univariate comparison, which did not account for important confounders such as age and  
39  
40 108 gender [17]-[20]. Second, no studies have investigated the hazard of the identified risk factors  
41  
42 109 over time, or the probability of survival at a given time. Under the rapidly changing pandemic  
43  
44 110 situation, it is crucial to provide timely survival-time guidance for implementing the targeted  
45  
46 111 treatment to the high-risk patients in clinical practice. Third, most existing studies on mortality  
47  
48 112 risk factors were focused on patients diagnosed in Wuhan, Hubei Province, with little  
49  
50 113 understanding about the mortality risk factors outside of Hubei Province. The risk factors are  
51  
52 114 likely different inside and outside of Hubei Province, since current research has found that the  
53  
54 115 clinical symptom severity [5] and the fatality-case rate [9], [21] to be higher in Hubei Province  
55  
56 116 (the center of outbreak) than cities outside of Hubei Province in China. Fourth, no studies thus  
57  
58 117 far have taken into account the pandemic stage when evaluating mortality risk factors. It has  
59  
60 118 been found that average daily attack rate in China was different before and after January 22<sup>nd</sup>  
119 2020, since non-pharmaceutical interventions were taken by the government before this date

1  
2  
3 120 [22]. The change of pandemic stage may also influence the risk factors for fatality associated  
4  
5 121 with COVID-19.

6  
7 122 To fill the above research gaps in the existing literature about the mortality risk factors  
8  
9 123 for COVID-19, the present study conducted a nested case-control (NCC) study, aiming to  
10  
11 124 evaluate the risk of the common pre-existing comorbidities (hypertension, coronary heart  
12  
13 125 disease, diabetes and etc.) for mortality associated with COVID-19 in mainland China outside of  
14  
15 126 Hubei Province. NCC, also called risk set sampling, has been widely used in studying the fatal  
16  
17 127 disease risk effect in large pharmacoepidemiologic studies [23]-[28] and risk prediction  
18  
19 128 in pandemic influenza A (H1N1) 2009 (pH1N1) [29]. NCC is cost-effective in data collection,  
20  
21 129 and is especially suitable for research on the death risk of diseases such as COVID-19, where the  
22  
23 130 number of event-free people largely exceeds those who experienced events [30]. To attain this  
24  
25 131 goal, we employed survival analysis on 275 publicly reported confirmed cases, adjusting for age,  
26  
27 132 gender and the change in the pandemic stage in China (i.e., before and after January 11<sup>th</sup>, 2020).

## 26 133 **Method**

### 29 134 **Study Design and Rationale**

30  
31 135 This study performed survival analysis under a nested case-control (NCC) design to  
32  
33 136 assess the roles of common comorbidities (cardiocerebrovascular, endocrine and respiratory  
34  
35 137 disease, etc.) in predicting mortality for COVID-19, among patients in mainland China outside of  
36  
37 138 Hubei Province. The study period was from December 18<sup>th</sup>, 2019, when the first laboratory-  
38  
39 139 confirmed case was announced in China, till March 8<sup>th</sup>, 2020.

40  
41 140 The study cohort was defined as all the publicly reported confirmed COVID-19 patients  
42  
43 141 outside of Hubei Province in mainland China between the study period. During this period, 112  
44  
45 142 deaths outside of Hubei Province were reported by the National Health Committee of China, and  
46  
47 143 18 were excluded from the present study due to missingness of important clinical information. A  
48  
49 144 total of 448 publicly reported laboratory-confirmed COVID-19 cases (94 deaths and 354  
50  
51 145 survivors) were initially collected. To avoid selection bias due to intentionally collecting patient  
52  
53 146 with certain pre-existing comorbidities, two authors independently collected, compared and  
54  
55 147 reviewed the full text of each case report. Following the typical NCC design setting where all  
56  
57 148 events are included and a certain numbers of control are matched with replacement, all deaths  
58  
59 149 were included as cases, and each case was matched with up to three controls on gender and age



1  
2  
3 150 ± 1 year old (94 cases and 181 controls). The sample distribution across all 32 province-level  
4 151 regions in mainland China is presented in Supplementary Table S1.

### 6 152 **Data Collection Procedure**

8 153 We routinely searched for daily news and public health reports on confirmed COVID-19  
9 154 cases in all areas in mainland China outside of Hubei Province. Patients' clinical and  
11 155 comorbidity characteristics were recorded and doubly confirmed by  
13 156 national/provincial/municipal health commission websites, the official COVID-19 data reporting  
15 157 websites in China. Follow-up time was defined as the duration from the date of disease onset till  
16 158 the end of observation on March 8<sup>th</sup> or when the participant died, whichever came first. For each  
18 159 eligible patient, we followed local reports to update their survival status until the end of follow-  
20 160 up time. Pre-existing comorbidities were recorded based on the description of case reports.

22 161 As illustrated in Figure 1, the inclusion criterion was publicly reported COVID-19 patients  
23 162 who had complete information on basic demographics (age, gender and region), disease onset  
25 163 date--the first time a patient became symptomatic, and history of comorbidities (include  
27 164 hypertension, CHD, cardiac failure, cerebral infarction, diabetes, chronic bronchitis, COPD,  
28 165 renal failure, hepatic and history of surgery) were included in the analysis. Asymptomatic  
30 166 patients were not included in this study. In addition, we defined "comorbidity-free patients" as  
32 167 those who were specifically described as "no pre-existing medical condition/comorbidity" on the  
34 168 national/provincial/municipal health commission websites.

36 169 In the following three steps, we used the No. 213 patient in the sample as an example to  
37 170 introduce the dynamic tracking method we used to identify any missing dates:

39 171 **Step 1.** Conducting an internet search on confirmed cases on baidu.com, the largest search  
41 172 engine in China, using keywords "confirmed COVID-19 cases report" and "pre-existing  
43 173 comorbidities." A search result pertained to one confirmed case reported on the website of  
44 174 Municipal Health Commission of Binzhou (Shandong Province) on February 17<sup>th</sup>,  
46 175 described as "*the 15<sup>th</sup> confirmed case: 30-year-old male without pre-existing morbidities,*  
48 176 *who lives in the neighborhood of Xincun Village. This patient was diagnosed positive on*  
49 177 *February 16<sup>th</sup> and is being treated with precaution in Bincheng hospital.*" We recorded  
51 178 age, gender, region and comorbidity-free for this patient.

1  
2  
3 179 **Step 2.** We then determined the onset date of this patient based on another announcement  
4 on the same website. In this announcement titled “*Possible exposure locations and times of*  
5 180 *the 15<sup>th</sup> confirmed case,*” it says, “*the patient was symptomatic on February 14<sup>th</sup>.*”  
6 181

7  
8 182 **Step 3.** Finally, we confirmed the event status of this patient as discharged on March 3<sup>rd</sup>,  
9 by following the updates on this website.  
10 183  
11 184

## 13 185 **Statistical Analysis**

15 186 Analyses were performed in R 3.6.2 (R Foundation for Statistical Computing) through  
16 RStudio version 1.2.5042. Data and code are available online at GitHub  
17 187 ([https://github.com/GuTian-TianGu/COVID-19\\_NCCstudy](https://github.com/GuTian-TianGu/COVID-19_NCCstudy)). Baseline clinical characteristics  
18 188 were shown as mean (SD), median (range), or number (%), with a comparison of characteristics  
19 189 in subjects stratified by case and control via the non-parametric Mann–Whitney U test for  
20 190 continuous variables and chi-squared or Fisher’s exact test for binary variables.  
21 191

22 192 In order to utilize the time-to-event information under the NCC design, the inverse  
23 193 probability weighting Cox proportional hazard regression model was employed [32]. The  
24 194 matching between cases and controls, and relative weights were simultaneously obtained via  
25 195 KMprob function in multipleNCC R package [31], by specifying the Kaplan-Meier type weights  
26 196 with additional matching on gender and age  $\pm 1$  year old. Only survivors were assigned weights,  
27 197 since all cases (deaths) were included as designed with a weight of one. A total of 113 survivors  
28 198 (mean age 46.5) with sampling probabilities of zero were considered as “fail to match” and  
29 199 excluded from the study, mainly due to younger age than cases. A majority of the excluded  
30 200 patients were from Shandong Province (38.1%) due to relatively high representation of the  
31 201 sample (detailed information of excluded survivors is available online at Github). In a sensitivity  
32 202 analysis adjusting for Shandong Province (results not shown here), we observed the consistent  
33 203 results as the main analysis.  
34 204

35 205 The comorbidity score was defined as the summation of nine comorbidities that have  
36 206 been specifically mentioned in relation to COVID-19 outcomes (CHD, hypertension, cardiac  
37 207 failure, cerebral infarction, chronic bronchitis, COPD, diabetes, renal failure and history of  
38 208 surgery), ranging from zero to nine. Kaplan-Meier curve was plotted to check the proportional  
39 209 hazard assumption and the Pearson correlation test was used to rule out the multicollinearity  
40 210 concern before fitting any model. Univariate weighted Cox models were performed for each  
41 211  
42  
43  
44  
45  
46  
47  
48  
49  
50  
51  
52  
53  
54  
55  
56  
57  
58  
59  
60

1  
2  
3 210 comorbidity. The multivariate weighted Cox model was used to determine if pre-existing  
4  
5 211 comorbidity yielded prognostic hazard information. We included those comorbidities that were  
6  
7 212 marginally significant ( $p < 0.1$ ) in the univariate analysis to the multivariate model. Other than the  
8  
9 213 common risk factors (age and gender), the multivariate model also adjusted for early period of  
10  
11 214 pandemic (after vs. before January 22<sup>nd</sup>, 2020 when no-intervention was taken by the  
12  
13 215 government) **Error! Reference source not found.** Although matching was based on age and  
14  
15 216 gender, we adjusted for the matching covariates, since the matching was broken with inverse  
16  
17 217 probability weighting [32]. A separate multivariate model was built by using the comorbidity  
18  
19 218 score as a continuous predictor, adjusting for the same covariates. Hazard ratios (HRs) from the  
20  
21 219 weighted Cox model were reported along with 95% confidence intervals (CIs) and p-values.  
22  
23 220 Sensitivity analysis was performed using multivariate logistic regression to provide estimated  
24  
25 221 odds ratio (ORs), which includes the same covariates as the multivariate weighted Cox model.

26  
27 222 Weighted Cox model-based survival estimates were plotted for an example patient profile  
28  
29 223 (65-year-old female with no other comorbidities) to compare the survival probability over time  
30  
31 224 with and without CHD. The log-rank test was used to compare the median survival difference.

## 32 225 **Results**

### 33 226 **Sample Description**

34 227 Table 1 summarizes patient demographics and pre-existing medical conditions. Results  
35  
36 228 are presented for all patients in the study ( $n=275$ ), as well as for cases ( $n=94$ ) and controls  
37  
38 229 ( $n=181$ ), respectively. Patients were 24-94 years old ( $\text{Mean}_{\text{age}} = 66.4$ ,  $\text{SD}_{\text{age}} = 14.5$ ). The average  
39  
40 230 age tended to be older in the case group (70.7 years old) than in the control group (64.2 years  
41  
42 231 old). Median ages were similar to mean ages in both groups. A majority (62.9%) of the patients  
43  
44 232 were male. Overall, 25.5% of the total patients had clinical symptoms associated with COVID-  
45  
46 233 19 before January 11<sup>th</sup>, 2020. A relatively small proportion of the total sample had COPD, renal  
47  
48 234 failure, history of surgery and hepatic failure (4.4%, 4.4%, 3.6% or 1.1%). Among all pre-  
49  
50 235 existing comorbidities with over 5% of the total sample, hypertension was the most common  
51  
52 236 (39.6%), followed by diabetes (26.2%), CHD (14.5%), cardiac failure (8%), cerebral infarction  
53  
54 237 (6.9%) and chronic bronchitis (6.9%). Patients in the case group had more CHD ( $p < 0.001$ ) and  
55  
56 238 more cerebral infarction ( $p = 0.05$ ), compared to those in the control group. The mean comorbidity

239 score was 1.22 (SD=1.21) in the overall sample, whereas 1.6 (SD=1.32) in the case and 1.02  
240 (SD=1.10) in the control group ( $p<0.001$ ).

241

## 242 **Model Results**

243 Results of the Pearson correlation test showed no significant correlations among the  
244 presence of comorbidities of interest, and the assumption of the proportional hazard was not  
245 violated.

246 Table 2 presents the results of univariate and multivariate weighted Cox models. Older  
247 age was associated with significantly higher death risk with similar magnitude in univariate and  
248 multivariate models. In the adjusted model, every 1-year increase in age was associated with an  
249 estimated 4% higher risk of death ( $p<0.001$ ). No significant hazard difference was found  
250 between male and female patients. Disease infection during the early no-intervention period was  
251 associated with a higher risk of death, although not statistically significant.

252 In a separate model using comorbidity score as predictor, we observed that higher  
253 comorbidity score was associated with higher mortality risk in both unadjusted and adjusted  
254 models ( $p=0.009$  and  $p=0.03$ , respectively). All pre-existing comorbidities had HR over one in  
255 the univariate model, of which CHD had the largest hazard ratio (HR) of 4.2 ( $p<0.001$ ), followed  
256 by cerebral infarction (HR=2.9,  $p=0.004$ ), COPD (HR=2.6,  $p=0.01$ ), renal failure (HR=2.3,  
257  $p=0.09$ ), cardiac failure (HR=1.9,  $p=0.1$ ), history of surgery (HR=1.7,  $p=0.34$ ), hypertension  
258 (HR=1.4,  $p=0.17$ ), diabetes (HR=1.1,  $p=0.61$ ) and chronic bronchitis (HR=1.1,  $p=0.55$ ), but not  
259 all statistically significant. After adjusting for age, gender, and early period of pandemic in  
260 China, CHD was the only comorbidity that yielded a significant death risk: COVID-19 patients  
261 with pre-existing CHD had an estimated 2.9 times death risk of those without CHD. In addition,  
262 cerebral infarction, COPD, and renal failure all had an estimated HR of around 2.0, respectively.  
263 Similar results were observed by using unweighted logistic regression in a sensitivity analysis  
264 (Supplementary Table S2).

265 The overall median follow-up was 40 days, during which 94 deaths were observed. Figure 2  
266 shows the estimated survival probability over 70 days for an example patient profile with and  
267 without CHD (65-year-old female with no other comorbidities). For such patient profile, having  
268 pre-existing CHD led to a significantly shorter survival probability over time, compared to those  
269 without CHD ( $p<0.001$ ). For those with CHD, the estimated 30-day survival probability was

1  
2  
3 270 0.53 (95% CI [0.34-0.82]), while on the other hand, this number was 0.85 (95% CI [0.79-0.91])  
4  
5 271 for those without CHD.  
6  
7 272

## 8 273 **Discussion**

9  
10 274 In this paper, we used survival analysis to estimate the fatal risk of pre-existing  
11 275 comorbidities in COVID-19, based on publicly reported confirmed cases and adjusted for the  
12 276 confounding effect of age, gender, and early period of the pandemic when no-intervention was  
13  
14 277 taken. There were three major findings: First, poor health condition was associated with higher  
15 278 death risk of COVID-19. Second, after adjusting for confounders, CHD was the only significant  
16  
17 279 risk factor for COVID-19 mortality. Patients with pre-existing CHD was 3.11 times more likely  
18  
19 280 of death, compared to those without ( $p<0.001$ ). For a patient profile (65-year-old female without  
20  
21 281 other comorbidities), the estimated 30-day survival probability for those with CHD was 0.53,  
22  
23 282 while it was 0.85 for those without CHD ( $p<0.001$ ). Third, older age was associated with  
24  
25 283 increased death risk. Specifically, every 1-year increase in age was associated with a 4%  
26  
27 284 increased risk of mortality ( $p<0.001$ ).  
28

29 285 To our best knowledge, the present study is the first to provide substantial statistical  
30  
31 286 evidence to show the effect of CHD in predicting mortality for COVID-19. This result is  
32  
33 287 consistent with previous studies that found higher case-fatality rate among patients with  
34  
35 288 cardiovascular disease [9], [15]. It is worth pointing out that the existing studies [9], [16] that  
36  
37 289 investigate prognostic factors for death used chi-square tests or univariate logistic regression that  
38  
39 290 does not control for potential confounders. In contrast, by conducting weighted Cox proportional  
40  
41 291 hazard regression models, our study used time-to-event outcomes, which offers more survival-  
42  
43 292 time-related information to help guide the clinical intervention and more statistical power to  
44  
45 293 detect risk factors [33][34].  
46

47 294 Previous studies have indicated that cardiovascular events following pneumonia may  
48  
49 295 increase the risk of mortality [35]-[41], which explained our findings from the viewpoint of  
50  
51 296 pathophysiological mechanisms. One potential mechanism underlying the association between  
52  
53 297 pneumonia and cardiovascular events is inflammation [38]. Specifically, the inflammatory  
54  
55 298 reaction following pneumonia can result in plaque instability and damage in the blood vessels,  
56  
57 299 where evidence of elevated local inflammation in the atherosclerotic coronary arteries following  
58  
59 300 acute systemic infections have been shown in many studies [38][40]. Thus, infections may result  
60

1  
2  
3 301 in heightened loading imposed on cardiomyocytes, and lead to sympathetic hyperactivity,  
4  
5 302 ischemia, which may increase the risk of arrhythmia and heart failure in COVID-19 patients with  
6  
7 303 pre-existing CHD [37].

8 304         Given the limited understanding of the prognostic factors for COVID-19, more research,  
9  
10 305 potentially prospective studies, are needed to investigate the mechanism by which pre-existing  
11  
12 306 CHD may influence the survival probability among patients with COVID-19. From the clinical  
13  
14 307 point of view, early evaluation of patient medical history is necessary to implement early  
15  
16 308 medical interventions and decrease the mortality risk. We suggest monitoring the dynamic heart  
17  
18 309 rate for patients with pre-existing CHD. For those severe-symptomatic patients who had pre-  
19  
20 310 existing heart ischemia and abnormal heart function, early medical intervention may be needed  
21  
22 311 [41].

23 312         Furthermore, our results indicated that the hazard of COVID-19 death was significantly  
24  
25 313 higher in patients at older ages. Adjusting for others, every 5-year increase in age was associated  
26  
27 314 with a 22% increased risk of death, similarly to what was found in previous studies [8][9], [16].  
28  
29 315 Alongside the evidence of prognostic risk in CHD, we suggest that extra care is needed for those  
30  
31 316 with CHD, especially for elderly patients.

32 317         Previous studies yielded mixed results regarding gender differences in mortality risk of  
33  
34 318 COVID-19. Some studies found male sex was associated with higher death risk of COVID-19  
35  
36 319 [42], whereas other studies did not find gender to be a significant factor predicting the mortality  
37  
38 320 risk of COVID-19 [43][44]. In the current study, gender was not a significant mortality risk  
39  
40 321 factor for COVID-19. It calls more future research to further our understanding of gender  
41  
42 322 difference in the outcome of COVID-19 and the underlying mechanism.

43 323         The design of excluding patients from Hubei Province was based on the concerns of  
44  
45 324 unknown confounders caused by insufficient medical resources in the epicenter. CDC's report  
46  
47 325 has pointed out that the rapidly increasing number of infections could easily crash the health care  
48  
49 326 system by exceeding its maximum capacity [45]. Therefore, analyzing patient data outside of  
50  
51 327 Hubei Province can avoid the competing death risk caused by insufficient health care resources,  
52  
53 328 and reveal the true underlying impact of pre-existing comorbidities on COVID-19 mortality [46].

54 329         It is worth noting that the data were collected when COVID-19 was spreading rapidly in  
55  
56 330 China, and the health authorities and researchers had limited understanding of the incubation  
57  
58  
59  
60

1  
2  
3 331 period, modes of viral transmission and effective treatment. Whether our findings can be  
4  
5 332 generalized to later epidemic phases warrant future research.

6 333 One limitation of the present study lies in the nature of publicly reported data.  
7  
8 334 Researchers have pointed out that severe cases may be over-represented in publicly reported data  
9  
10 335 [47]. Nevertheless, we have managed to reduce the potential bias caused by severe case over-  
11  
12 336 representation, through the appropriate matching between cases and controls in NCC design. The  
13  
14 337 auto-matching procedure via statistical program also prevented the possibility of tendentiously  
15  
16 338 selecting survivors with comorbidity-free history during data collection. In addition, NCC design  
17  
18 339 is favored in our situation where the risk factor data and event of interest can be identified  
19  
20 340 opportunistically from publicly reported confirmed cases [30]. Therefore, NCC was the optimal  
21  
22 341 choice, given the restricted availability of public data. Moreover, due to the lack of information  
23  
24 342 of treatment in the health reports published by the local health commission websites, we did not  
25  
26 343 include treatment information into analysis, which may produce confounding effects. It calls for  
27  
28 344 future research to investigate the mortality risk effect of pre-existing comorbidities by adding  
29  
30 345 treatment as a covariate in the model. Lastly, we were not able to verify the missing at random  
31  
32 346 assumption of the 18 missing deaths (9 from Heilongjiang, 5 from Henan, 3 from Beijing, and 2  
33  
34 347 from Hunan) as well as the survivors.

35 348 In conclusion, our findings provided preliminary yet strong evidence supporting the  
36  
37 349 association between pre-existing CHD and mortality risk for patients with COVID-19. Based on  
38  
39 350 our findings, close monitoring, extra care, and early medical intervention are needed for patients  
40  
41 351 with pre-existing CHD, to reduce the mortality risk associated with COVID-19.

42 352  
43 353  
44 354  
45 355  
46 356  
47 357  
48 358  
49 359  
50 360  
51 361  
52  
53  
54  
55  
56  
57  
58  
59  
60

1  
2  
3 **362 Footnotes**  
4

5 **363 Author Contributions**

6  
7 364 TG conducted the analysis, interpreted the data, drafted the article and rechecked the transcribed  
8  
9 365 manuscript. QC conducted literature review and drafted the article. ZY guided and supervised  
10  
11 366 the statistical analysis. BF helped with data analysis. AL helped data collection, management,  
12  
13 367 and quality check. LX provided clinical support and interpretation of the results. RW collected,  
14  
15 368 pre-processed and managed data, and conducted preliminary data analysis. YH guided and  
16  
17 369 supervised the research process, and provided funding support. All authors critically revised the  
18  
19 370 manuscript for intellectual content, approved the final draft, and agree to accountability for all  
20  
21 371 aspects of the work.  
22

23 **373 Conflict of Interest**

24 374 The authors have no affiliations with or involvement in any organization or entity with any  
25  
26 375 financial or non-financial interest in the subject matter or materials discussed in this manuscript.  
27

28  
29 **377 Ethics Approval**

30  
31 378 The data published in news reports and websites were open to the public and free of identifiers.  
32  
33 379 The study was approved by Shanghai Jiao Tong University Public Health and Nursing Medical  
34  
35 380 Research Ethics Committee (SJUPN-202001).  
36

37  
38 **382 Patient and Public Involvement**

39  
40 383 This study used publicly reported patient-level data. All data were available online to the public.  
41  
42 384 No patient recruitment was involved in the study design, and no personal information can be  
43  
44 385 identified from the data.  
45

46  
47 **387 Funding**

48  
49 388 This project was funded by the National Natural Science Foundation of China (No. 71874111),  
50  
51 389 Shanghai Municipal Health Bureau Foundation (No. 201740116) and Shanghai Jiao Tong  
52  
53 390 University Scientific and Technological Innovation Funds (YG2020YQ01, YG2020YQ06).  
54

55 **392 Data sharing statement**  
56  
57  
58  
59  
60



1  
2  
3 393 Raw data is available at GitHub [https://github.com/GuTian-TianGu/COVID-19\\_NCCstudy.git](https://github.com/GuTian-TianGu/COVID-19_NCCstudy.git).

4  
5 394

6  
7 395 **Exclusive Licence**

8 396 I, the Submitting Author has the right to grant and does grant on behalf of all authors of the  
9  
10 397 Work (as defined in the below author licence), an exclusive licence and/or a non-exclusive  
11  
12 398 licence for contributions from authors who are: i) UK Crown employees; ii) where BMJ has  
13  
14 399 agreed a CC-BY licence shall apply, and/or iii) in accordance with the terms applicable for US  
15  
16 400 Federal Government officers or employees acting as part of their official duties; on a worldwide,  
17  
18 401 perpetual, irrevocable, royalty-free basis to BMJ Publishing Group Ltd (“BMJ”) its licensees and  
19  
20 402 where the relevant Journal is co-owned by BMJ to the co-owners of the Journal, to publish the  
21  
22 403 Work in BMJ Open and any other BMJ products and to exploit all rights, as set out in  
23  
24 404 our licence.

25  
26 405

27 406 The Submitting Author accepts and understands that any supply made under these terms is made  
28  
29 407 by BMJ to the Submitting Author unless you are acting as an employee on behalf of your  
30  
31 408 employer or a postgraduate student of an affiliated institution which is paying any applicable  
32  
33 409 article publishing charge (“APC”) for Open Access articles. Where the Submitting Author  
34  
35 410 wishes to make the Work available on an Open Access basis (and intends to pay the relevant  
36  
37 411 APC), the terms of reuse of such Open Access shall be governed by a Creative Commons licence  
38  
39 412 – details of these licences and which Creative Commons licence will apply to this Work are set  
40  
41 413 out in our licence referred to above.

42  
43 414

44  
45 415 **Word count**

46  
47 416 3506

48  
49 417

50  
51 418

52  
53 419

54  
55 420

56  
57 421

58  
59 422

60  
61 423

## Reference

- [1] Coronavirus disease 2019 (COVID-19) Situation Report – 62. [https://www.who.int/docs/default-source/coronaviruse/situation-reports/20200322-sitrep-62-covid-19.pdf?sfvrsn=f7764c46\\_2](https://www.who.int/docs/default-source/coronaviruse/situation-reports/20200322-sitrep-62-covid-19.pdf?sfvrsn=f7764c46_2)
- [2] Lu R, Zhao X, Li J, Niu P, Yang B, Wu H *et al*. Genomic characterisation and epidemiology of 2019 novel coronavirus: implications for virus origins and receptor binding. *Lancet* 2020; **395**: 565-74.
- [3] Huang C, Wang Y, Li X, Ren L, Zhao J, Hu Y *et al*. Clinical features of patients infected with 2019 novel coronavirus in Wuhan, China. *Lancet* 2020; **395**: 497-506.
- [4] Chen N, Zhou M, Dong X, Qu J, Gong F, Han Y *et al*. Epidemiological and clinical characteristics of 99 cases of 2019 novel coronavirus pneumonia in Wuhan, China: a descriptive study. *Lancet* 2020; **395**: 507-13.
- [5] Xu Xiao-Wei, Wu Xiao-Xin, JiangXian-Gao, Xu Kai-Jin, Ying Ling-Jun, Ma Chun-Lian *et al*. Clinical findings in a group of patients infected with the 2019 novel coronavirus (SARS-Cov-2) outside of Wuhan, China: retrospective case series. *BMJ* 2020; **368**: m606.
- [6] Wang D, Hu B, Hu C *et al*. Clinical characteristics of 138 hospitalized patients with 2019 novel coronavirus–infected pneumonia in Wuhan, China. *JAMA* 2020; **323**: 1061–1069.
- [7] Zhang, J-J, Dong, X, Cao, Y-Y *et al*. Clinical characteristics of 140 patients infected with SARS-CoV-2 in Wuhan, China. *Allergy* 2020; **00**: 1– 12.
- [8] Guan WJ, Ni ZY, Hu Y, Liang WH, Ou CQ, He JX *et al*. Clinical characteristics of coronavirus disease 2019 in China. *N Engl J Med* 2020. [Epub ahead of print].
- [9] Wu Z, McGoogan JM. Characteristics of and important lessons from the coronavirus disease 2019 (COVID-19) Outbreak in China: summary of a report of 72314 cases from the Chinese Center for Disease Control and Prevention. *JAMA* 2020. [Epub ahead of print].
- [10] Ruan Q, Yang K, Wang W, Jiang L, Song J. Clinical predictors of mortality due to COVID-19 based on an analysis of data of 150 patients from Wuhan, China. *Intensive Care Med* 2020. [Epub ahead of print].

- 1  
2  
3 461 [11]Shi, S., Qin, M., Shen, Bo. et al. Association of Cardiac Injury with Mortality in  
4 462 Hospitalized Patients With COVID-19 in Wuhan, China. *JAMA Cardiol* 2020. [Epub ahead  
5 463 of print].  
6 464
- 7 465 [12]Liu, J. , Tu, C. , Zhu, M. , Wang, J. , Yang, C. , Liu, W. and Xiong, B., Exploring the Law  
8 466 of Development and Prognostic Factors of Common and Severe COVID-19: A  
9 467 Retrospective Case-Control Study in 122 Patients with Complete Course of Disease. *Lancet*  
10 468 2020 [Epub ahead of print].  
11 469
- 12 470 [13]Liang W, Guan W, Chen R, Wang W, Li J, Xu K *et al.* Cancer patients in SARS-CoV-2  
13 471 infection: a nationwide analysis in China. *The Lancet Oncology*.2020; **21**: 335-7.  
14 472
- 15 473 [14]Mao R, Liang J, Shen J, Ghosh S, Zhu LR, Yang H *et al.* Implications of COVID-19 for  
16 474 patients with pre-existing digestive diseases. *The lancet Gastroenterology & hepatology*  
17 475 2020. [Epub ahead of print].  
18 476
- 19 477 [15]Deng SQ, Peng HJ. Characteristics of and public health responses to the coronavirus disease  
20 478 2019 outbreak in China.*J Clin Med* 2020; **9**: 575.  
21 479
- 22 480 [16]Zhou F, Yu T, Du R, Fan G, Liu Y, Liu Z, *et al.* Clinical course and risk factors for  
23 481 mortality of adult inpatients with COVID-19 in Wuhan, China: a retrospective cohort study.  
24 482 *Lancet* 2020. [Epub ahead of print]  
25 483
- 26 484 [17]Appelros P, Stegmayr B, Terent A. Sex differences in stroke epidemiology: a systematic  
27 485 review, *Stroke* 2009; **40**: 1082-90.  
28 486
- 29 487 [18]Camp P G , Goring S M . Gender and the diagnosis, management, and surveillance of  
30 488 chronic obstructive pulmonary disease. *Ann AmThorac Soc* 2007; **4**: 686-691.  
31 489
- 32 490 [19]Tchkonia T, Kirkland JL. Aging, cell senescence, and chronic disease: emerging therapeutic  
33 491 strategies. *JAMA* 2018; **320**: 1319–20.  
34 492
- 35 493 [20]Prasad S, Sung B, Aggarwal BB. Age-associated chronic diseases require age-old medicine:  
36 494 Role of chronic inflammation. *Prev Med* 2012; **54**: S29-S37.  
37 495
- 38 496 [21]Chinese COVID-19 Outbreak Distribution System. Available at  
39 497 <http://2019ncov.chinacdc.cn/2019-nCoV/>  
40 498
- 41 499 [22]Wang, C. et al. Association of Public Health Interventions with the Epidemiology of the  
42 500 COVID-19 Outbreak in Wuhan, China. *JAMA*. 2020;323(19):1915–1923.

- 1  
2  
3 501  
4 502 [23] Azoulay L, Dell'Aniello S, Gagnon B, *et al.* Metformin and Incidence of Prostate Cancer in  
5 503 Patients with Type 2 Diabetes. *Cancer Epidemiol Biomarkers Prev* 2011; **20**: 337–344.  
6 504  
7  
8 505 [24] Schlienger RG, Fedson DS, Jick SS, Jick H, Meier CR. Statins and the risk of pneumonia: a  
9 506 population-based, nested case-control study. *Pharmacotherapy* 2007; **27**: 325–332.  
10 507  
11  
12 508 [25] Lipscombe LL, Levesque LE, Gruneir A, *et al.* Antipsychotic drugs and the risk of  
13 509 hyperglycemia in older adults without diabetes: a population-based observational study. *Am*  
14 510 *J Geriatr Psychiatry* 2011; **19**: 1026-1033.  
15 511  
16  
17 512 [26] Lipscombe LL, Gomes T, Levesque LE, *et al.* Thiazolidinediones and cardiovascular  
18 513 outcomes in older patients with diabetes. *J Am Med Assoc* 2007; **298**: 2634–2643.  
19 514  
20  
21 515 [27] Levesque LE, Brophy JM, Zhang B. The risk for myocardial infarction with  
22 516 cyclooxygenase-2 inhibitors: a population study of elderly adults. *Ann Intern Med* 2005;  
23 517 **142**: 481–489.  
24 518  
25  
26 519 [28] Cerfolio RJ, Bryant AS. Survival and outcomes of pulmonary resection for non-small cell  
27 520 lung cancer in the elderly: A nested case-control study. *Ann Thorac Surg* 2006; **82**: 424-430.  
28 521  
29  
30 522 [29] Khandaker G, Rashid H, Zurynski Y, *et al.* Nosocomial vs community-acquired pandemic  
31 523 influenza A (H1N1) 2009: a nested case-control study. *J Hosp Infect* 2012; **82**:94–100.  
32 524  
33  
34 525 [30] Langholz, B. and Clayton, D. Sampling Strategies in Nested Case-Control  
35 526 Studies. *Environ Health Persp* 1994;**102**: 47–51.  
36 527  
37  
38 528 [31] Stoer, N. and Samuelsen, S. multipleNCC. Weighted Cox-Regression for Nested Case-  
39 529 Control Data. R package version 1.2-2.2020. Available at [https://CRAN.R-](https://CRAN.R-project.org/package=multipleNCC)  
40 530 [project.org/package=multipleNCC](https://CRAN.R-project.org/package=multipleNCC)  
41 531  
42  
43 532 [32] Stoer, N. and Samuelsen, S. Inverse probability weighting in nested case-control studies  
44 533 with additional matching - a simulation study. *Stat Med* 2013;**32**, 5328-5339.  
45 534  
46  
47 535 [33] George B, Seals S, Aban I. Survival analysis and regression models. *J NuclCardiol* 2014;  
48 536 **21**: 686–694.  
49 537  
50  
51 538 [34] Annesi I, Moreau T, Lellouch J. Efficiency of the logistic regression and Cox proportional  
52 539 hazards models in longitudinal studies. *Stat Med* 1989; **8**: 1515–1521.  
53 540  
54  
55  
56  
57  
58  
59  
60

- 1  
2  
3 541 [35] Chen N, Zhou M, Dong X, Qu J, Gong F, Han Y, *et al.* Epidemiological and clinical  
4 542 characteristics of 99 cases of 2019 novel coronavirus pneumonia in Wuhan, China: a  
5 543 descriptive study. *Lancet* 2020; **395**: 507-13.  
6 544  
7  
8 545 [36] Tralhão A, Póvoa P. Cardiovascular Events After Community-Acquired Pneumonia: A  
9 546 Global Perspective with Systematic Review and Meta-Analysis of Observational Studies, *J*  
10 547 *Clin Med* 2020, **9**: 414.  
11 548  
12  
13 549 [37] Kirchhof, P., Benussi, S., Kotecha, D., Ahlsson, A., Atar, D., Casadei, B., Castella,  
14 550 M., Diener, H.C., Heidbuchel, H., Hendriks, J. *et al.* 2016 ESC Guidelines for the  
15 551 management of atrial fibrillation developed in collaboration with EACTS. *Eur. Heart J*  
16 552 2016; **37**: 2893–2962.  
17 553  
18  
19 554 [38] Libby, P. Mechanisms of Acute Coronary Syndromes and Their Implications for Therapy.  
20 555 *N. Engl. J. Med* 2013; **368**: 2004–2013  
21 556  
22  
23 557 [39] Madjid, M., Vela, D., Khalili-Tabrizi, H., Casscells, S.W., Litovsky, S. Systemic infections  
24 558 cause exaggerated local inflammation in atherosclerotic coronary arteries: Clues to the  
25 559 triggering effect of acute infections on acute coronary syndromes. *Tex. Heart Inst. J* 2007,  
26 560 **34**:11–18.  
27 561  
28  
29 562 [40] Mauriello, A., Sangiorgi, G., Fratoni, S., Palmieri, G., Bonanno, E., Anemona, L., Schwartz,  
30 563 R.S., Spagnoli, L.G. Diffuse and Active Inflammation Occurs in Both Vulnerable and Stable  
31 564 Plaques of the Entire Coronary Tree A Histopathologic Study of Patients Dying of Acute  
32 565 Myocardial Infarction. *J Am Coll Cardiol* 2005; **45**: 1585–1593.  
33 566  
34  
35 567 [41] Zhu J., Zhang X., Shi G., Yi K., Tan X. Atrial fibrillation is an independent risk factor for  
36 568 hospital-acquired pneumonia. *PLoS ONE*. 2015; **10**: e0131782.  
37 569  
38  
39 570 [42] Li X, Xu S, Yu M, *et al.* Risk factors for severity and mortality in adult COVID-19  
40 571 inpatients in Wuhan [published online ahead of print, 2020 Apr 12]. *J Allergy Clin Immunol*.  
41 572 2020. doi:10.1016/j.jaci.2020.04.006  
42 573  
43  
44 574 [43] Zhou F, Yu T, Du R, Fan G, Liu Y, Liu Z, *et al.* Clinical course and risk factors for mortality  
45 575 of adult inpatients with COVID-19 in Wuhan, China: a retrospective cohort study. *Lancet*.  
46 576 2020. doi: 10.1016/S0140-6736(20)30566-3  
47 577  
48  
49 578 [44] Ruan Q, Yang K, Wang W, Jiang L, Song J. Clinical predictors of mortality due to COVID-  
50 579 19 based on an analysis of data of 150 patients from Wuhan, China. *Intensive Care Med*.  
51 580 2020; **46**(5):846-848.  
52 581  
53  
54  
55  
56  
57  
58  
59

1  
2  
3 582 [45] Qualls, N., Levitt, A., Kanade, N., *et al.* Community mitigation guidelines to prevent  
4 583 pandemic influenza - United States, 2017. *MMWR Recomm Rep.* 2017; **66**: 1–34.

5 584  
6 585 [46] Ji, Y., Ma, Z., Peppelenbosch, MP., Pan Q. Potential association between COVID-19  
7 586 mortality and health-care resource availability. *Lancet Glob Health.* 2020. [Epub ahead of  
8 587 print].

9 588  
10 589 [47] Lauer SA, Grantz KH, Bi Q, Jones FK, Zheng Q, Meredith HR, *et al.* The Incubation Period  
11 590 of Coronavirus Disease 2019 (COVID-19) From Publicly Reported Confirmed Cases:  
12 591 Estimation and Application. *Ann Intern Med* 2020. [Epub ahead of print].  
13 592

## 14 593 **Correspondence**

15 594 Address offprint requests to Dr. Wu at School of Social Development, East China Normal  
16 595 University, 500 Dongchuan Rd., Shanghai 200241, China ([rjwu@re.ecnu.edu.cn](mailto:rjwu@re.ecnu.edu.cn)), or Dr. He at  
17 596 College of Public Health, Shanghai Jiao Tong University School of Medicine, South Chongqing  
18 597 Rd., No. 227, Shanghai 200025, China ([hypcyr@sina.com](mailto:hypcyr@sina.com)), respectively.  
19 598

20 599

21 600

22 601

23 602

24 603

25 604

26 605

27 606

28 607

29 608

30 609

31 610

32 611

33 612

34

35

36

37

613 **Tables and Figures****Table 1.** Patient Characteristics, stratified by survival status\*

|                                       | <b>Overall</b><br>(N=275), n (%) | <b>Case (deaths)</b><br>(N=94), n (%) | <b>Control (survivors)</b><br>(N=181), n (%) | <b>P Value †</b> |
|---------------------------------------|----------------------------------|---------------------------------------|----------------------------------------------|------------------|
| <b>Matching variables</b>             |                                  |                                       |                                              |                  |
| Age                                   |                                  |                                       |                                              |                  |
| Mean (SD)                             | 66.4 (14.5)                      | 70.7 (13.3)                           | 64.2 (14.7)                                  | <b>&lt;0.001</b> |
| Median (IQR)                          | 68.0 [22]                        | 72.5 [16]                             | 67.0 [22]                                    | -                |
| Male                                  | 173 (62.9)                       | 56 (59.6)                             | 117 (64.6)                                   | 0.49             |
| <b>Other covariates</b>               |                                  |                                       |                                              |                  |
| Before 01/22/2020                     | 70 (25.5)                        | 27 (28.7%)                            | 43 (23.8)                                    | 0.52             |
| History of surgery                    | 10 (3.6)                         | 4 (4.3)                               | 6 (3.3)                                      | 0.74             |
| <b>Cardiocerebrovascular diseases</b> |                                  |                                       |                                              |                  |
| Hypertension                          | 109 (39.6)                       | 42 (44.7)                             | 67 (37.0)                                    | 0.27             |
| CHD                                   | 40 (14.5)                        | 25 (26.6)                             | 15 (8.3)                                     | <b>&lt;0.001</b> |
| Cardiac failure                       | 22 (8.0)                         | 10 (10.6)                             | 12 (6.6)                                     | 0.35             |
| Cerebral infarction                   | 19 (6.9)                         | 11 (11.7)                             | 8 (4.4)                                      | <b>0.05</b>      |
| <b>Endocrine diseases</b>             |                                  |                                       |                                              |                  |
| Diabetes                              | 72 (26.2)                        | 26 (25.4)                             | 46 (27.7)                                    | 0.80             |
| <b>Respiratory diseases</b>           |                                  |                                       |                                              |                  |
| Chronic bronchitis                    | 19 (6.9)                         | 7 (7.4)                               | 12 (6.6)                                     | 1.00             |
| COPD                                  | 12 (4.4)                         | 7 (7.4)                               | 5 (2.8)                                      | 0.14             |
| <b>Other diseases</b>                 |                                  |                                       |                                              |                  |
| Renal failure                         | 12 (4.4)                         | 6 (6.4)                               | 6 (3.3)                                      | 0.38             |
| Hepatic failure                       | 3 (1.1)                          | 3 (3.2)                               | 0 (0)                                        | 0.07             |
| <b>Comorbidity score</b>              |                                  |                                       |                                              |                  |
| Mean (SD)                             | <b>1.22 (1.21)</b>               | <b>1.60 (1.32)</b>                    | <b>1.02 (1.10)</b>                           | <b>&lt;0.001</b> |

CHD: coronary heart disease; COPD: chronic obstructive pulmonary disease.

\*Mean (standard deviation) is reported for the continuous variables and the counts (%) for categorical variables. p values were calculated by the Mann–Whitney U test,  $\chi^2$  test, or Fisher's exact test, as appropriate.

Bold: statistically significant using threshold  $p < 0.05$

614

615

616

617

618

**Table 2.** Univariate and multivariate model result from weighted Cox proportional hazard regression

| Characteristic        | Univariate       |                  | Multivariate     |                  | Multivariate  |                  | P Value           |                  |
|-----------------------|------------------|------------------|------------------|------------------|---------------|------------------|-------------------|------------------|
|                       | HR (95% CI)      | P Value          | HR (95% CI)      | P Value          | HR (95% CI)   | P Value          | HR (95% CI)       | P Value          |
| Age                   | 1.05 (1.0-1.1)   | <b>&lt;0.001</b> | 1.0 (1.0-1.1)    | <b>&lt;0.001</b> | 1.0 (1.0-1.1) | <b>&lt;0.001</b> | 1.04 (1.02-1.06)  | <b>&lt;0.001</b> |
| Male                  | 0.76 (0.5-1.2)   | 0.24             | 1.1 (0.7-1.7)    | 0.74             | 1.1 (0.7-1.7) | 0.71             | 0.997 (0.62-1.60) | 0.99             |
| Before 01/22/2020     | 1.12 (0.7-1.8)   | 0.66             | 1.3 (0.8-2.1)    | 0.29             | 1.2 (0.7-1.9) | 0.48             | 1.21 (0.74-1.98)  | 0.45             |
| Comorbidity Score     | 1.50 (1.27-1.75) | <b>&lt;0.001</b> | 1.31 (1.11-1.54) | <b>0.001</b>     | NA            | NA               | NA                | NA               |
| Cardiocerebrovascular |                  |                  |                  |                  |               |                  |                   |                  |
| CHD                   | 4.19 (2.5-7.1)   | <b>&lt;0.001</b> | NA               | NA               | 2.9 (1.7-4.9) | <b>&lt;0.001</b> | 3.01 (1.82-4.98)  | <b>&lt;0.001</b> |
| Hypertension          | 1.37 (0.9-2.2)   | 0.17             | NA               | NA               | NA            | NA               | NA                | NA               |
| Cardiac failure       | 1.85 (0.9-3.9)   | 0.10             | NA               | NA               | NA            | NA               | NA                | NA               |
| Cerebral infarction   | 2.86 (1.4-5.8)   | <b>0.004</b>     | NA               | NA               | NA            | NA               | 1.90 (0.94-3.8)   | 0.07             |
| Respiratory           |                  |                  |                  |                  |               |                  |                   |                  |
| Chronic bronchitis    | 1.05 (0.4-2.5)   | 0.55             | NA               | NA               | NA            | NA               | NA                | NA               |
| COPD                  | 2.61 (1.2-5.6)   | <b>0.01</b>      | NA               | NA               | NA            | NA               | 1.85 (0.89-3.85)  | 0.10             |
| Endocrine             |                  |                  |                  |                  |               |                  |                   |                  |
| Diabetes              | 1.14 (0.7-1.9)   | 0.61             | NA               | NA               | NA            | NA               | NA                | NA               |
| Others                |                  |                  |                  |                  |               |                  |                   |                  |
| Renal failure         | 2.30 (0.9-6.0)   | 0.09             | NA               | NA               | NA            | NA               | 2.02 (0.81-5.07)  | 0.13             |
| History of surgery    | 1.71 (0.6-5.1)   | 0.34             | NA               | NA               | NA            | NA               | NA                | NA               |

HR=hazard ratio;

CHD=coronary heart disease;

COPD=chronic obstructive pulmonary disease;

Bold: statistically significant using threshold  $p < 0.05$ .

619

620

621

622

623

624



1  
2  
3 625  
45 626 **Figure 1:** Patient flow diagram detailing included subjects and exclusion criteria  
6 6277  
8 628 **Figure 2:** Estimated survival probability over time from the adjusted Cox proportional hazard  
9  
10 629 model for an example patient profile (65-year-old female without CHD [dashed line] or with  
11 630 CHD [solid line], who had no other comorbidities). The estimated 30-day survival probability  
12 631 was 0.53 (95% CI [0.34-0.82]) for patients with pre-existing CHD, while 0.85 (95% CI [0.79-  
13 632 0.91]) for those without ( $p<0.001$ ). CHD=coronary heart disease.  
14  
15  
16  
17 633

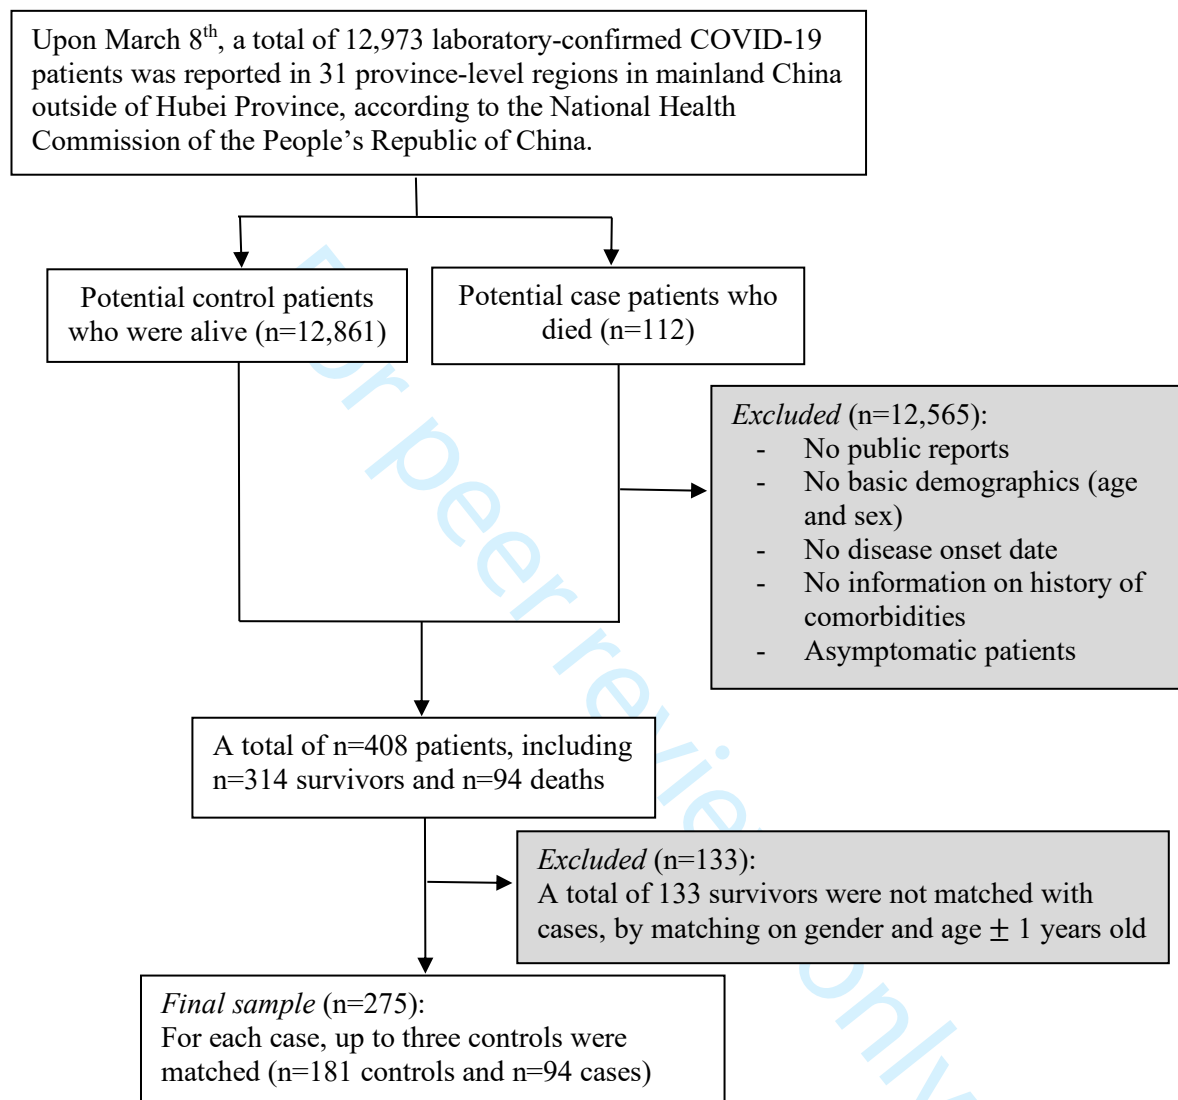

**Figure 1:** Patient flow diagram detailing included subjects and exclusion criteria

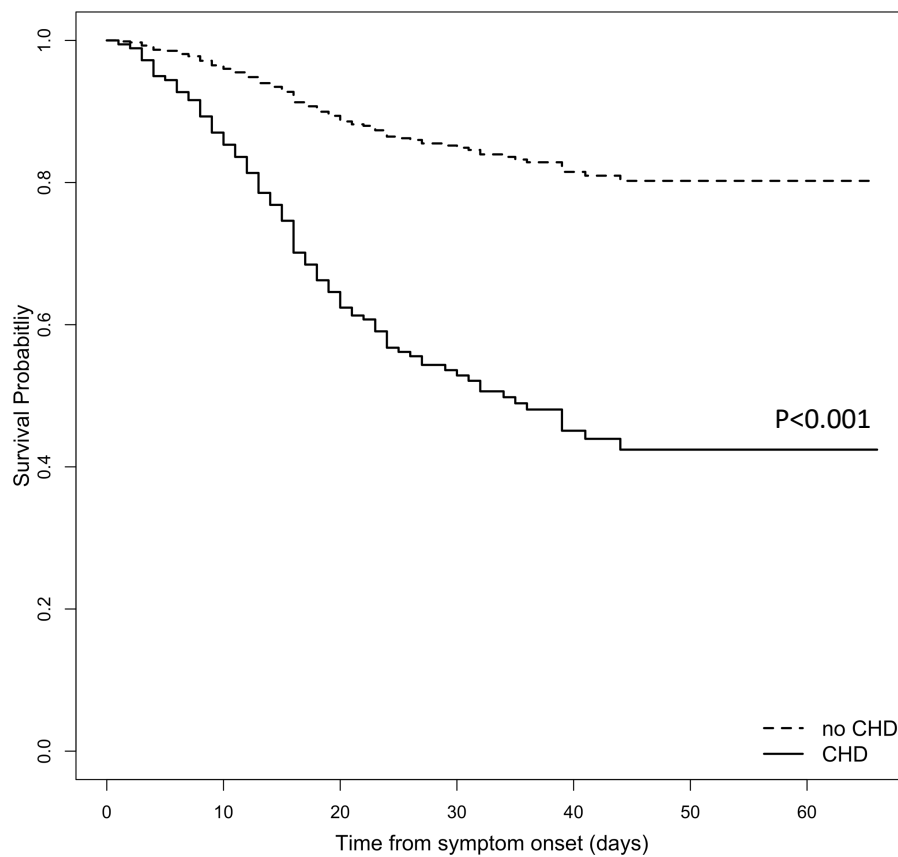

**Figure 2:** Estimated survival probability over time from the adjusted Cox proportional hazard model for an example patient profile (65-year-old female without CHD [dashed line] or with CHD [solid line], who had no other comorbidities). The estimated 30-day survival probability was 0.53 (95% CI [0.34-0.82]) for patients with pre-existing CHD, while 0.85 (95% CI [0.79-0.91]) for those without ( $p<0.001$ ). CHD=coronary heart disease.

**Supplementary Table S1.** Sample distribution across all 32 province-level in mainland China

| Province     | Survivors        |              | Deaths           |              |
|--------------|------------------|--------------|------------------|--------------|
|              | National total n | Sample n (%) | National total n | Sample n (%) |
| Guangdong    | 1343             | 9 (0.67)     | 8                | 8 (100.00)   |
| Henan        | 1265             | 7 (0.55)     | 22               | 17 (77.30)   |
| Zhejiang     | 1205             | 10 (0.83)    | 1                | 1 (100.00)   |
| Hunan        | 1003             | 15 (1.50)    | 4                | 2 (50.00)    |
| Anhui        | 981              | 9 (0.92)     | 6                | 6 (100.00)   |
| Jiangxi      | 932              | 3 (0.32)     | 1                | 1 (100.00)   |
| Shandong     | 692              | 66 (9.54)    | 6                | 6 (100.00)   |
| Jiangsu      | 618              | 13 (2.10)    | 0                | 0 (100.00)   |
| Chongqing    | 576              | 0 (0.00)     | 6                | 6 (100.00)   |
| Sichuan      | 535              | 4 (0.75)     | 3                | 3 (100.00)   |
| Heilongjiang | 475              | 6 (1.26)     | 13               | 9 (69.20)    |
| Beijing      | 425              | 3 (0.71)     | 8                | 3 (37.50)    |
| Shanghai     | 339              | 3 (0.88)     | 3                | 3 (100.00)   |
| Hebei        | 312              | 6 (1.92)     | 6                | 6 (100.00)   |
| Fujian       | 294              | 2 (0.68)     | 1                | 1 (100.00)   |
| Guangxi      | 250              | 2 (0.80)     | 2                | 2 (100.00)   |
| Shaanxi      | 239              | 6 (2.51)     | 1                | 1 (100.00)   |
| Yunnan       | 171              | 3 (1.75)     | 2                | 1 (50.00)    |
| Hainan       | 163              | 5 (3.07)     | 6                | 6 (100.00)   |
| Guizhou      | 144              | 2 (1.39)     | 2                | 2 (100.00)   |
| Tianjin      | 132              | 4 (3.03)     | 3                | 3 (100.00)   |
| Shanxi       | 131              | 2 (1.53)     | 0                | 0 (100.00)   |
| Liaoning     | 125              | 0 (0.00)     | 1                | 0 (0.00)     |
| Gansu        | 123              | 1 (0.81)     | 2                | 2 (100.00)   |
| Jilin        | 92               | 1 (1.09)     | 1                | 1 (100.00)   |
| Xinjiang     | 76               | 0 (0.00)     | 3                | 3 (100.00)   |
| Neimenggu    | 73               | 2 (2.74)     | 1                | 1 (100.00)   |
| Ningxia      | 75               | 0 (0.00)     | 0                | 0 (100.00)   |
| Hubei*       | NA               | NA           | NA               | NA           |
| Total        | 12698            | 275 (2.17)   | 112              | 94 (83.9)    |

\*Hubei Province was excluded from this study

**Supplementary Table S2: Results from unweighted logistic regression**

|                     | Multivariate     |              |               |              |               |              |
|---------------------|------------------|--------------|---------------|--------------|---------------|--------------|
|                     | OR (95% CI)      | P Value      | OR (95% CI)   | P Value      | OR (95% CI)   | P Value      |
| Age                 | 1.0 (1.0-1.1)    | <b>0.03</b>  | 1.0 (1.0-1.1) | <b>0.007</b> | 1.0 (1.0-1.1) | <b>0.05</b>  |
| Male                | 1.1 (0.6-1.7)    | 0.98         | 1.1 (0.6-1.8) | 0.87         | 1.0 (0.5-1.7) | 0.89         |
| Before 01/11/2020   | 1.7 (0.9-3.1)    | 0.09         | 1.6 (0.9-2.9) | 0.12         | 1.7 (0.9-3.1) | 0.09         |
| Comorbidity Score   | 1.12 (1.09-1.72) | <b>0.007</b> | NA            | NA           | NA            | NA           |
| CHD                 | NA               | NA           | 3.3 (1.6-6.9) | <b>0.002</b> | 3.4 (1.7-7.4) | <b>0.001</b> |
| Cerebral infarction | NA               | NA           | NA            | NA           | 2.5 (0.9-7.0) | 0.08         |
| COPD                | NA               | NA           | NA            | NA           | 2.5 (0.7-9.4) | 0.14         |
| Renal failure       | NA               | NA           | NA            | NA           | 1.9 (0.5-7.0) | 0.30         |

OR=odds ratio; CHD=coronary heart disease; COPD=chronic obstructive pulmonary disease.

Bold: statistically significant using threshold  $p < 0.05$

# BMJ Open

## History of coronary heart disease increased the mortality rate of COVID-19 patients: a nested case-control study

|                                 |                                                                                                                                                                                                                                                                                                                                                                                                                                                                                                                                                                                                                                                                                                                                    |
|---------------------------------|------------------------------------------------------------------------------------------------------------------------------------------------------------------------------------------------------------------------------------------------------------------------------------------------------------------------------------------------------------------------------------------------------------------------------------------------------------------------------------------------------------------------------------------------------------------------------------------------------------------------------------------------------------------------------------------------------------------------------------|
| Journal:                        | <i>BMJ Open</i>                                                                                                                                                                                                                                                                                                                                                                                                                                                                                                                                                                                                                                                                                                                    |
| Manuscript ID                   | bmjopen-2020-038976.R2                                                                                                                                                                                                                                                                                                                                                                                                                                                                                                                                                                                                                                                                                                             |
| Article Type:                   | Original research                                                                                                                                                                                                                                                                                                                                                                                                                                                                                                                                                                                                                                                                                                                  |
| Date Submitted by the Author:   | 07-Aug-2020                                                                                                                                                                                                                                                                                                                                                                                                                                                                                                                                                                                                                                                                                                                        |
| Complete List of Authors:       | Gu, Tian; University of Michigan, Biostatistics<br>Chu, Qiao; Shanghai Jiao Tong University School of Medicine, School of Public Health<br>Zhang-Sheng, Yu; Shanghai Jiao Tong University, Department of Bioinformatics and Biostatistics<br>Fa, Botao; Shanghai Jiao Tong University, Department of Bioinformatics and Biostatistics<br>Li, Anqi; East China Normal University, School of Social Development<br>Xu, Lei; Shanghai Chest Hospital, Department of Cardiology; Shanghai Jiao Tong University<br>Wu, Ruijun; East China Normal University, School of Social Development<br>He, Yaping; Shanghai Jiao Tong University, School of Public Health; Shanghai Jiao Tong University, Center for Health Technology Assessment |
| <b>Primary Subject Heading</b>: | Infectious diseases                                                                                                                                                                                                                                                                                                                                                                                                                                                                                                                                                                                                                                                                                                                |
| Secondary Subject Heading:      | Epidemiology, Public health                                                                                                                                                                                                                                                                                                                                                                                                                                                                                                                                                                                                                                                                                                        |
| Keywords:                       | Epidemiology < INFECTIOUS DISEASES, Coronary heart disease < CARDIOLOGY, Public health < INFECTIOUS DISEASES                                                                                                                                                                                                                                                                                                                                                                                                                                                                                                                                                                                                                       |
|                                 |                                                                                                                                                                                                                                                                                                                                                                                                                                                                                                                                                                                                                                                                                                                                    |

SCHOLARONE™  
Manuscripts



I, the Submitting Author has the right to grant and does grant on behalf of all authors of the Work (as defined in the below author licence), an exclusive licence and/or a non-exclusive licence for contributions from authors who are: i) UK Crown employees; ii) where BMJ has agreed a CC-BY licence shall apply, and/or iii) in accordance with the terms applicable for US Federal Government officers or employees acting as part of their official duties; on a worldwide, perpetual, irrevocable, royalty-free basis to BMJ Publishing Group Ltd ("BMJ") its licensees and where the relevant Journal is co-owned by BMJ to the co-owners of the Journal, to publish the Work in this journal and any other BMJ products and to exploit all rights, as set out in our [licence](#).

The Submitting Author accepts and understands that any supply made under these terms is made by BMJ to the Submitting Author unless you are acting as an employee on behalf of your employer or a postgraduate student of an affiliated institution which is paying any applicable article publishing charge ("APC") for Open Access articles. Where the Submitting Author wishes to make the Work available on an Open Access basis (and intends to pay the relevant APC), the terms of reuse of such Open Access shall be governed by a Creative Commons licence – details of these licences and which [Creative Commons](#) licence will apply to this Work are set out in our licence referred to above.

Other than as permitted in any relevant BMJ Author's Self Archiving Policies, I confirm this Work has not been accepted for publication elsewhere, is not being considered for publication elsewhere and does not duplicate material already published. I confirm all authors consent to publication of this Work and authorise the granting of this licence.

# History of coronary heart disease increased the mortality rate of COVID-19 patients: a nested case-control study

Tian Gu, MS<sup>1</sup>; Qiao Chu, PhD<sup>2</sup>; Zhangsheng Yu, PhD<sup>3</sup>; Botao Fa, MS<sup>3</sup>; Anqi Li, MS<sup>4</sup>; Lei Xu, MD<sup>5</sup>; Ruijun Wu, PhD<sup>4</sup>; Yaping He, PhD<sup>2</sup>

## Author affiliations:

1. Department of Biostatistics, School of Public Health, University of Michigan, Ann Arbor, MI, USA
2. School of Public Health, Shanghai Jiao Tong University School of Medicine, Shanghai, China
3. Department of Bioinformatics and Biostatistics, Shanghai Jiao Tong University, Shanghai, China
4. School of Social Development, East China Normal University, Shanghai, China
5. Department of Cardiology, Shanghai Chest Hospital, Shanghai Jiao Tong University, Shanghai, China

## Corresponding authors:

Prof. Ruijun Wu: School of Social Development, East China Normal University, 500

Dongchuan Rd., Shanghai 200241, China

Phone: +86 (021) 62235782

Fax: +86 (021) 62604330

[rjwu@re.ecnu.edu.cn](mailto:rjwu@re.ecnu.edu.cn)

Prof. Yaping He: College of Public Health, Shanghai Jiao Tong University School of

Medicine, South Chongqing Rd., No. 227, Shanghai 200025, China

Phone: +86 (021) 63846590\*776494

Fax: +86 (021) 33310986

[hypcyr@sina.com](mailto:hypcyr@sina.com)

## Key words:

Epidemiology, Survival Analysis, Coronary Disease

## Word count

3585



## 33 Abstract

34 **Objective:** Evaluate the risk of pre-existing comorbidities on COVID-19 mortality, and  
35 provide clinical suggestions accordingly.

36 **Setting:** A nested case-control design using confirmed case reports released from the news or  
37 the national/provincial/municipal health commissions of China between December 18, 2019,  
38 and March 8, 2020.

39 **Participants:** Patients with confirmed SARS-CoV-2 infection, excluding asymptomatic  
40 patients, in mainland China outside of Hubei Province.

41 **Outcome measures:** Patient demographics, survival time and status, and history of  
42 comorbidities.

43 **Method:** A total of 94 publicly reported deaths in locations outside of Hubei Province,  
44 mainland China, were included as cases. Each case was matched with up to three controls,  
45 based on gender and age  $\pm$  1 year old (94 cases and 181 controls). The inverse  
46 probabilityweighted Cox proportional hazard model was performed, controlling for age,  
47 gender, and the early period of the outbreak.

48 **Results:** Of the 94 cases, the median age was 72.5 years old (IQR=16), and 59.6% were male,  
49 while in the control group the median age was 67 years old (IQR=22), and 64.6% were male.  
50 Adjusting for age, gender, and the early period of the outbreak, poor health conditions were  
51 associated with a higher risk of COVID-19 mortality (hazard ratio of comorbidity score, 1.31  
52 [95% confidence interval (CI): 1.11-1.54];  $p=0.001$ ). The estimated mortality risk in patients  
53 with pre-existing coronary heart disease (CHD) was three times that of those without CHD  
54 ( $p<0.001$ ). The estimated 30-day survival probability for a profile patient with pre-existing  
55 CHD (65-year-old female with no other comorbidities) was 0.53 (95% CI, 0.34-0.82), while  
56 it was 0.85 (95% CI, 0.79-0.91) for those without CHD. Older age was also associated with  
57 increased mortality risk: Every 1-year increase in age was associated with a 4% increased  
58 risk of mortality ( $p<0.001$ ).

59 **Conclusion:** Extra care and early medical interventions are needed for patients with pre-  
60 existing comorbidities, especially CHD.

61

62

63

64

65

## 66 **Strengths and limitations of this study**

67 (i) Since we used data outside of the epicenter of the outbreak in mainland China, we  
68 avoided the competing mortality risk caused by insufficient health care resources; (ii) the  
69 study controlled for the confounding effects of age, gender, and the early period of the  
70 pandemic, which were, in general, not considered in the existing literatures; (iii) the survival-  
71 time-related statistical results can help guide the early clinical intervention to reduce  
72 mortality; (iv) the lack of medical test results in the publicly reported data restricted further  
73 investigation on the association between comorbidity-related clinical index and mortality; and  
74 (v) the missing at random assumption could not be verified.

## 76 **Introduction**

77 Since the first report of coronavirus disease 2019 (COVID-19) in December 2019 in  
78 Wuhan, Hubei Province, China, the novel virus infection has rapidly spread to other cities in  
79 China and has now been detected in 186 countries and locations internationally [1]. On March  
80 11, 2020, the World Health Organization (WHO) declared COVID-19 a pandemic and has  
81 called for aggressive actions from all countries to fight the disease. Current research has  
82 indicated that COVID-19 is caused by severe acute respiratory syndrome coronavirus 2  
83 (SARS-CoV-2), a beta-coronavirus similar to the severe acute respiratory  
84 syndrome coronavirus (SARS-CoV) in its genetic sequence [2]. Epidemiological evidence  
85 suggests that the initial reported cases in China had a history of exposure to the Huanan  
86 seafood market [3]-[4]. With the escalated spread of the infection, there has been clear  
87 evidence of human-to-human transmission [5]-[6]. The most common symptoms include  
88 fever, dry cough, and fatigue [5]-[8], and there are asymptomatic yet contagious cases [9].

89 According to the COVID-19 situation reports of WHO, as of June 13, 2020, there  
90 were 83,132 confirmed cases in mainland China, including 4,634 deaths. Internationally, a  
91 total of 7.41 million confirmed cases and 418,000 deaths have been reported from 186  
92 countries outside of China. Considering the global public health threat posed by COVID-19,  
93 unraveling the prognostic factors for patients, especially the risk factors of mortality  
94 associated with COVID-19, has important implications for clinical practice and is urgently  
95 warranted.

96 Studies have indicated that in severe cases, patients tend to be older in age [6], [8] and  
97 are more likely to have had pre-existing medical conditions, including but not limited to  
98 hypertension [3], [6], [8], diabetes [6],[8], cardiovascular diseases [3], [6], [8], [10]-[12],

1  
2  
3 99 cerebrovascular diseases [6], chronic obstructive pulmonary disease (COPD) [3], [8], cancer  
4 [13], and digestive diseases [14], in comparison to those with non-severe cases [3], [6], [8]-  
5 100 [15].  
6 101  
7

8 102 Recently, scholarly attention has focused on identifying the risk factors for death from  
9 COVID-19. Some evidence suggests that pre-existing medical conditions are likely risk  
10 103 factors for death from COVID-19. For example, a study based on 72,314 cases in China  
11 104 indicated that the case-fatality rate (CFR) tends to be higher among those who are older in  
12 105 age and who have pre-existing cardiovascular disease, diabetes, and/or hypertension[9].  
13 106 Similarly, by conducting logistic regression on odds of in-hospital deaths among 54 diseased  
14 107 patients and 137 recovered patients in Wuhan City, Hubei Province, Zhou et al. (2020) [16]  
15 108 found that older age, higher Sequential Organ Failure Assessment (SOFA) score, and D-  
16 109 dimer greater than 1ug/ml at hospital admission were associated with increased odds of in-  
17 110 hospital death. Chen et al. (2020) found that pre-existing hypertension and other  
18 111 cardiovascular complications were more common among diseased patients than recovered  
19 112 patients [4].  
20 113

21 114 However, several gaps remain in the understanding of risk factors for mortality of  
22 115 COVID-19. First, most current research on pre-existing comorbidities of COVID-19 was  
23 116 based on univariate comparison, which did not account for important confounders such as  
24 117 age and gender [17]-[20]. Second, no studies have investigated the hazard of the identified  
25 118 risk factors over time or the probability of survival at a given time. Under the rapidly  
26 119 changing pandemic situation, it is crucial to provide timely survival-time guidance for  
27 120 implementing the targeted treatment to the high-risk patients in clinical practice. Third, most  
28 121 existing studies on mortality risk factors were focused on patients diagnosed in Wuhan,  
29 122 Hubei Province, with little understanding about the mortality risk factors outside of Hubei  
30 123 Province. The risk factors are likely different inside and outside of Hubei Province since  
31 124 current research has found the clinical symptom severity [5] and the CFR [9], [21] to be  
32 125 higher in Hubei Province (the center of outbreak) than in cities outside of Hubei Province in  
33 126 China. Fourth, no studies thus far have taken into account the pandemic stage when  
34 127 evaluating mortality risk factors. It has been found that the average daily infection rate in  
35 128 China was different before and after January 22, 2020, since non-pharmaceutical  
36 129 interventions were taken by the government before this date [22]. The change of time in the  
37 130 pandemic stage may also influence the risk factors for fatality associated with COVID-19.  
38 131

39 132 To fill the above research gaps in the existing literature about the mortality risk  
40 factors for COVID-19, the present study was conducted using a nested case-control (NCC)

1  
2  
3 133 study, which aimed to evaluate the risk of the common pre-existing comorbidities  
4 (hypertension, CHD, diabetes, etc.) for mortality associated with COVID-19 in mainland  
5 134 China outside of Hubei Province. NCC, also called risk set sampling, has been widely used in  
6 135 studying fatal disease risk effect in large pharmacoepidemiological studies [23]-[28] and risk  
7 136 prediction in pandemic influenza A (H1N1) 2009 (pH1N1) [29]. NCC is cost-effective in  
8 137 data collection and is especially suitable for research on the mortality risk of diseases such as  
9 138 COVID-19, where the number of event-free people largely exceeds those who are  
10 139 symptomatic [30]. To attain this goal, we employed survival analysis on 275 publicly  
11 140 reported confirmed cases, adjusting for age, gender, and the change in the pandemic stage in  
12 141 China (i.e., before and after January 22, 2020).  
13 142

## 143 **Method**

### 144 **Study Design and Rationale**

145 This study performed survival analysis under an NCC design to assess the roles of  
146 common comorbidities (cardiocerebrovascular, endocrine, and respiratory disease, etc.) in  
147 predicting mortality for COVID-19 among patients in mainland China outside of Hubei  
148 Province. The study period was from December 18, 2019, when the first laboratory-  
149 confirmed case was announced in China, to March 8, 2020.

150 The study cohort was defined as all the publicly reported confirmed COVID-19  
151 patients outside of Hubei Province in mainland China during the study period. During this  
152 period, 112 deaths outside of Hubei Province were reported by the National Health  
153 Committee of China, and 18 were excluded from the present study due to the missingness of  
154 important clinical information. A total of 448 publicly reported laboratory-confirmed  
155 COVID-19 cases (94 deaths and 354 survivors) were initially collected. To avoid selection  
156 bias due to intentionally collecting patients with certain pre-existing comorbidities, two  
157 authors independently collected, compared, and reviewed the full text of each case report.  
158 Following the typical NCC design setting where all events are included and a certain number  
159 of controls are matched with replacements, all deaths were included as cases, and each case  
160 was matched with up to three controls on gender and age  $\pm$  1 year old (94 cases and 181  
161 controls). The sampledistribution across all 32 province-level regions in mainland China is  
162 presented in Supplementary Table S1.

### 163 **Data Collection Procedure**

164 We routinely searched for daily news and public health reports on confirmed COVID-  
165 19 cases in all areas in mainland China outside of Hubei Province. Patients' clinical and

1  
2  
3 166 comorbidity characteristics were recorded and doubly confirmed by  
4  
5 167 national/provincial/municipal health commission websites, the official COVID-19 data  
6  
7 168 reporting websites in China. Follow-up time was defined as the duration from the date of  
8  
9 169 disease onset until the end of observation on March 8, 2020, or when the participant died,  
10  
11 170 whichever came first. For each eligible patient, we followed local reports to update their  
12  
13 171 survival status until the end of follow-up time. Pre-existing comorbidities were recorded  
14  
15 172 based on the descriptions in case reports.

15 173 As illustrated in Figure 1, the inclusion criteria were publicly reported COVID-19  
16  
17 174 patients who had complete information on basic demographics (age, gender, and region),  
18  
19 175 disease onset date (the first time they became symptomatic), and the history of comorbidities  
20  
21 176 (including hypertension, coronary heart disease (CHD), cardiac failure, cerebral infarction,  
22  
23 177 diabetes, chronic bronchitis, COPD, renal failure, and history of surgery). Asymptomatic  
24  
25 178 patients were not included in this study. In addition, we defined “comorbidity-free patients”  
26  
27 179 as those who were specifically described as “no pre-existing medical condition/comorbidity”  
28  
29 180 on the national/provincial/municipal health commission websites.

29 181 In the following three steps, we used patientno. 213 in the sample as an example to  
30  
31 182 introduce the dynamic tracking method we used to identify any missing dates.

32  
33 183 **Step 1.** We conducted an internet search on confirmed cases on baidu.com, the largest  
34  
35 184 search engine in China, using the keywords “confirmed COVID-19 cases report” and  
36  
37 185 “pre-existing comorbidities.” A search result pertained to one confirmed case reported  
38  
39 186 on the website of the Municipal Health Commission of Binzhou (Shandong Province)  
40  
41 187 on February 17, described as “*the 15<sup>th</sup> confirmed case: 30-year-old male without pre-*  
42  
43 188 *existing morbidities, who lives in the neighborhood of Xincun Village. This patient was*  
44  
45 189 *diagnosed positive on February 16<sup>th</sup> and is being treated with precaution in Bincheng*  
46  
47 190 *hospital.*” We recorded the age, gender, and region of this patient and that he was  
48  
49 191 comorbidity-free.

48 192 **Step 2.** We then determined the onset date of COVID-19 in this patient based on  
49  
50 193 another announcement on the same website. In this announcement titled “*Possible*  
51  
52 194 *exposure locations and times of the 15<sup>th</sup> confirmed case,*” it says, “*the patient was*  
53  
54 195 *symptomatic on February 14<sup>th</sup>.*”

55 196 **Step 3.** Finally, following the updates on the website, we confirmed the event status of  
56  
57 197 this patient as discharged on March 3, 2020.

## 58 198 **Statistical Analysis**

59  
60

1  
2  
3 199 Analyses were performed in R 3.6.2 (R Foundation for Statistical Computing) through  
4  
5 200 RStudio version 1.2.5042. Data and codes are available online at GitHub  
6  
7 201 ([https://github.com/GuTian-TianGu/COVID-19\\_NCCstudy](https://github.com/GuTian-TianGu/COVID-19_NCCstudy)). Baseline clinical characteristics  
8  
9 202 were shown as mean (SD), median (range), or number (%), with a comparison of  
10  
11 203 characteristics in subjects stratified by case and control via the non-parametric Mann–  
12  
13 204 Whitney U test for continuous variables and chi-squared or Fisher’s exact test for binary  
14  
15 205 variables.

15 206 In order to utilize the time-to-event information under the NCC design, the inverse  
16  
17 207 probability weighted Cox proportional hazard regression model was employed [31]. The  
18  
19 208 matching between cases and controls and relative weights were simultaneously obtained via  
20  
21 209 KMprob function in multipleNCC R package [32] by specifying the Kaplan-Meier type  
22  
23 210 weights with additional matching on gender and age  $\pm 1$  year old. Only survivors were  
24  
25 211 assigned weights since all cases (deaths) were included as designed with a weight of one. A  
26  
27 212 total of 113 survivors (mean age 46.5) with sampling probabilities of zero were considered  
28  
29 213 “fail to match” and excluded from the study, mainly due to younger age than cases. A  
30  
31 214 majority of the excluded patients were from Shandong Province (38.1%) due to the relatively  
32  
33 215 high representation of the sample (detailed information of excluded survivors is available  
34  
35 216 online at GitHub). In a sensitivity analysis adjusting for Shandong Province (results not  
36  
37 217 shown here), we observed the consistent results as the main analysis.

36 218 The comorbidity score, ranging from zero to nine, was defined as the summation of  
37  
38 219 nine comorbidities that have been specifically mentioned in relation to COVID-19 outcomes  
39  
40 220 (CHD, hypertension, cardiac failure, cerebral infarction, chronic bronchitis, COPD, diabetes,  
41  
42 221 renal failure, and history of surgery). The Kaplan-Meier curve was plotted to check the  
43  
44 222 proportional hazard assumption, and the Pearson correlation test was used to rule out the  
45  
46 223 multicollinearity concern before fitting any model. Univariate weighted Cox models were  
47  
48 224 performed for each comorbidity. The multivariate weighted Cox model was used to  
49  
50 225 determine if pre-existing comorbidity yielded prognostic hazard information. We included  
51  
52 226 those comorbidities that were marginally significant ( $p < 0.1$ ) in the univariate analysis to the  
53  
54 227 multivariate model. Other than the common risk factors (age and gender), the multivariate  
55  
56 228 model also adjusted for the early period of the pandemic (after vs. before January 22, 2020,  
57  
58 229 when no intervention was taken by the government) [22]. Although matching was based on  
59  
60 230 age and gender, we adjusted for the matching covariates since the matching was broken with  
61  
62 231 inverse probability weighting [31]. A separate multivariate model was built by using the  
63  
64 232 comorbidity score as a continuous predictor, adjusting for the same covariates. Hazard ratios

233 (HRs) from the weighted Cox model were reported along with 95% CIs and p-values.  
234 Sensitivity analysis was performed using multivariate logistic regression to provide estimated  
235 odds ratio (ORs), which included the same covariates as the multivariate weighted Cox  
236 model.

237 Weighted Cox model-based survival estimates were plotted for a sample patient  
238 profile (65-year-old female with no other comorbidities) to compare the survival probability  
239 over time with and without CHD. The log-rank test was used to compare the median survival  
240 difference.

## 241 Results

### 242 Sample Description

243 Table 1 summarizes patient demographics and pre-existing medical conditions. Results are  
244 presented for all patients in the study (n=275) as well as for cases (n=94) and controls  
245 (n=181), respectively. Patients were 24-94 years old (Mean<sub>age</sub>=66.4, SD<sub>age</sub>=14.5). The  
246 average age tended to be older in the case group (70.7 years old) than in the control group  
247 (64.2 years old). Median ages were similar to mean ages in both groups. A majority (62.9%)  
248 of the patients were male. Overall, 25.5% of the total patients had clinical symptoms  
249 associated with COVID-19 before January 22, 2020. A relatively small proportion of the total  
250 sample had COPD, renal failure, history of surgery, and hepatic failure (4.4%, 4.4%, 3.6%,  
251 and 1.1%, respectively). Among all pre-existing comorbidities with over 5% of the total  
252 sample, hypertension was the most common (39.6%), followed by diabetes (26.2%), CHD  
253 (14.5%), cardiac failure (8%), cerebral infarction (6.9%), and chronic bronchitis (6.9%).  
254 Patients in the case group had more CHD (p<0.001) and more cerebral infarction (p=0.05)  
255 than those in the control group. The mean comorbidity score was 1.22 (SD=1.21) in the  
256 overall sample and 1.6 (SD=1.32) in the case and 1.02 (SD=1.10) in the control group  
257 (p<0.001).

### 258 Model Results

259 Results of the Pearson correlation test showed no significant correlations with the  
260 presence of comorbidities of interest, and the assumption of the proportional hazard was not  
261 violated.

262 Table 2 presents the results of univariate and multivariate weighted Cox models.  
263 Older age was associated with significantly higher risk of death with similar magnitude in  
264 univariate and multivariate models. In the adjusted model, every 1-year increase in age was  
265 associated with an estimated 4% higher risk of death (p<0.001). No significant hazard

1  
2  
3 266 difference was found between male and female patients. Disease infection during the early  
4  
5 267 no-intervention period was associated with a higher risk of death but was not statistically  
6  
7 268 significant.

8  
9 269 In a separate model using the comorbidity score as a predictor, we observed that a  
10  
11 270 higher comorbidity score was associated with a higher mortality risk in both unadjusted and  
12  
13 271 adjusted models ( $p=0.009$  and  $p=0.03$ , respectively). All pre-existing comorbidities had an  
14  
15 272 HR over 1 in the univariate model, of which CHD had the largest HR of 4.2 ( $p<0.001$ ),  
16  
17 273 followed by cerebral infarction (HR=2.9,  $p=0.004$ ), COPD (HR=2.6,  $p=0.01$ ), renal failure  
18  
19 274 (HR=2.3,  $p=0.09$ ), cardiac failure (HR=1.9,  $p=0.1$ ), history of surgery (HR=1.7,  $p=0.34$ ),  
20  
21 275 hypertension (HR=1.4,  $p=0.17$ ), diabetes (HR=1.1,  $p=0.61$ ), and chronic bronchitis (HR=1.1,  
22  
23 276  $p=0.55$ ), but not all were statistically significant. After adjusting for age, gender, and the  
24  
25 277 early period of the pandemic in China, CHD was the only comorbidity that yielded a  
26  
27 278 significant mortality risk: COVID-19 patients with pre-existing CHD had an estimated 2.9  
28  
29 279 times higher risk of death than those without CHD. In addition, cerebral infarction, COPD,  
30  
31 280 and renal failure all had an estimated HR of around 2.0. Similar results were observed by  
32  
33 281 using unweighted logistic regression in a sensitivity analysis (Supplementary Table S2).

34  
35 282 The overall median follow-up was 40 days, during which 94 deaths were observed.  
36  
37 283 Figure 2 shows the estimated survival probability over 70 days for a sample patient profile  
38  
39 284 with and without CHD (65-year-old female with no other comorbidities). For such a patient  
40  
41 285 profile, having pre-existing CHD led to a significantly shorter survival probability over time  
42  
43 286 compared to those without CHD ( $p<0.001$ ). For those with CHD, the estimated 30-day  
44  
45 287 survival probability was 0.53 (95% confidence interval [CI] [0.34-0.82]); on the other hand,  
46  
47 288 this number was 0.85 (95% CI [0.79-0.91]) for those without CHD.

## 48 289 **Discussion**

49  
50 290 In our research, based on publicly reported confirmed cases and adjusted for the  
51  
52 291 confounding effect of age, gender, and the early period of the pandemic when no intervention  
53  
54 292 was taken, we used survival analysis to estimate the fatality risk of pre-existing comorbidities  
55  
56 293 in COVID-19. There were three major findings: First, poor health condition was associated  
57  
58 294 with higher mortality risk of COVID-19. Second, after adjusting for confounders, CHD was  
59  
60 295 the only significant risk factor for COVID-19 mortality. Patients with pre-existing CHD were  
296  
297 3.11 times more likely to die than those without CHD ( $p<0.001$ ). For one patient profile (65-  
298  
year-old female without other comorbidities), we saw an estimated 30-day survival  
probability of 0.85 ( $p<0.001$ ). However, for those with CHD, the 30-day survival probability



1  
2  
3 299 was 0.53. Third, older age was associated with an increased risk of death. Specifically, every  
4  
5 300 1-year increase in age was associated with a 4% increased risk of mortality ( $p<0.001$ ).

6 301 To the best of our knowledge, the present study is the first to provide substantial  
7  
8 302 statistical evidence showing the effect of CHD in predicting mortality for COVID-19. This  
9  
10 303 result is consistent with previous studies that found higher CFR among patients with  
11  
12 304 cardiovascular disease [9], [15]. It is worth pointing out that the existing studies [9], [16] that  
13  
14 305 investigate prognostic factors for death used chi-square tests or univariate logistic regression  
15  
16 306 that does not control for potential confounders. In contrast, by conducting weighted Cox  
17  
18 307 proportional hazard regression models, our study used time-to-event outcomes, which offer  
19  
20 308 more survival-time-related information to help guide the clinical intervention and more  
21  
22 309 statistical power to detect risk factors [33][34].

23 310 Previous studies have indicated that cardiovascular events following pneumonia may  
24  
25 311 increase the risk of mortality [4], [35]-[40], which explained our findings from the viewpoint  
26  
27 312 of pathophysiological mechanisms. One potential mechanism underlying the association  
28  
29 313 between pneumonia and cardiovascular events is inflammation [37]. Specifically, the  
30  
31 314 inflammatory reaction following pneumonia can result in plaque instability and damage in  
32  
33 315 the blood vessels. Evidence of elevated local inflammation in the atherosclerotic coronary  
34  
35 316 arteries following acute systemic infections has been shown in many studies [37][39]. Thus,  
36  
37 317 infections may result in heightened loading that is imposed on cardiomyocytes and lead to  
38  
39 318 sympathetic hyperactivity or ischemia, which may increase the risk of arrhythmia and heart  
40  
41 319 failure in COVID-19 patients with pre-existing CHD [36].

42 320 Given the limited understanding of the prognostic factors for COVID-19, more  
43  
44 321 research, including potentially prospective studies, is needed to investigate the mechanism by  
45  
46 322 which pre-existing CHD may influence the survival probability of patients with COVID-19.  
47  
48 323 From the clinical point of view, early evaluation of a patient's medical history is necessary to  
49  
50 324 implement early medical interventions and decrease the mortality risk. We suggest  
51  
52 325 monitoring the dynamic heart rate for patients with pre-existing CHD. For those severe  
53  
54 326 symptomatic patients who had pre-existing heart ischemia and abnormal heart function, early  
55  
56 327 medical intervention may be needed [40].

57 328 Furthermore, our results indicated that the risk of death from COVID-19 was  
58  
59 329 significantly higher in older patients. Adjusting for others, every 1-year increase in age was  
60  
330 associated with a 4% increased risk of death, which is similar to what was found in previous  
331 studies [8][9], [16]. Alongside the evidence of prognostic risk in CHD, we suggest that extra  
332 care is needed for those with CHD, especially for elderly patients.

1  
2  
3 333 Previous studies yielded mixed results regarding gender differences in mortality risk  
4  
5 334 of COVID-19. Some studies found male sex was associated with a higher risk of death from  
6  
7 335 COVID-19 [41], whereas other studies did not find gender to be a significant factor  
8  
9 336 predicting the mortality risk of COVID-19 [10], [16]. In the current study, gender was not a  
10  
11 337 significant mortality risk factor for COVID-19. More research is needed to further our  
12  
13 338 understanding of gender differences in the outcome of COVID-19 and underlying  
14  
15 339 mechanisms.

15 340 The design of excluding patients from Hubei Province was based on the concerns of  
16  
17 341 unknown confounders caused by insufficient medical resources in the epicenter. CDC's  
18  
19 342 report has pointed out that the rapidly increasing number of infections could easily crash the  
20  
21 343 health care system by exceeding its maximum capacity [42]. Therefore, analyzing patient  
22  
23 344 data outside of Hubei Province avoided the competing mortality risk caused by insufficient  
24  
25 345 health care resources and revealed the true underlying impact of pre-existing comorbidities  
26  
27 346 on COVID-19 mortality [43].

27 347 This study has several limitations. It is worth noting that the data were collected when  
28  
29 348 COVID-19 was spreading rapidly in China and the health authorities and researchers had  
30  
31 349 limited understanding of the incubation period, modes of viral transmission, and effective  
32  
33 350 treatment. Whether our findings can be generalized to later epidemic phases warrants future  
34  
35 351 research. One limitation of the present study lies in the nature of publicly reported data.  
36  
37 352 Researchers have pointed out that severe cases may be overrepresented in publicly reported  
38  
39 353 data [44]. Nevertheless, we have managed to reduce the potential bias caused by severe case  
40  
41 354 overrepresentation by appropriately matching the cases and controls in the NCC design.  
42  
43 355 Following the NCC design, we allowed the controls to be matched with cases on age  $\pm$  1  
44  
45 356 year old instead of the exact matching, which caused the significant age difference between  
46  
47 357 two groups (Table 1). Thus, we adjusted for the matching covariates in all the models to  
48  
49 358 address this [31]. The auto-matching procedure via the statistical program also prevented the  
50  
51 359 possibility of tendentiously selecting survivors with comorbidity-free history during data  
52  
53 360 collection. In addition, NCC design is favored in our situation where the risk factor data and  
54  
55 361 event of interest can be identified opportunistically from publicly reported confirmed cases  
56  
57 362 [30]. Therefore, NCC was the optimal choice, given the restricted availability of public data.  
58  
59 363 Moreover, due to the lack of information of treatment in the health reports published by the  
60  
364 local health commission websites, we did not include treatment information into analysis,  
365 which may produce confounding effects. It calls for future research to investigate the  
366 mortality risk effect of pre-existing comorbidities by adding treatment as a covariate in the

1  
2  
3 367 model. Lastly, we were not able to verify the missing at random assumption of the 18 missing  
4  
5 368 deaths (four from Heilongjiang, five from Henan, five from Beijing, two from Hunan, one  
6  
7 369 from Liaoning and one from Yunnan) as well as the survivors.

8 370 In conclusion, our findings provided preliminary yet strong evidence supporting the  
9  
10 371 association between pre-existing CHD and mortality risk for patients with COVID-19. Based  
11  
12 372 on our findings, close monitoring, extra care, and early medical intervention are needed for  
13  
14 373 patients with pre-existing CHD to reduce the mortality risk associated with COVID-19.

15 374  
16  
17  
18  
19  
20  
21  
22  
23  
24  
25  
26  
27  
28  
29  
30  
31  
32  
33  
34  
35  
36  
37  
38  
39  
40  
41  
42  
43  
44  
45  
46  
47  
48  
49  
50  
51  
52  
53  
54  
55  
56  
57  
58  
59  
60

For peer review only

1  
2  
3 375 **Footnotes**

4  
5 376 **Author Contributions**

6 377 TG conducted the analysis, interpreted the data, drafted the article, and rechecked the  
7  
8 378 transcribed manuscript. QC conducted the literature review and drafted the article. ZY guided  
9  
10 379 and supervised the statistical analysis. BF helped with data analysis. AL helped with  
11  
12 380 literature review, data collection, management and the data quality check, and was  
13  
14 381 responsible for reference organization. LX provided clinical support and interpretation of the  
15  
16 382 results. RW collected, preprocessed and managed data, and conducted preliminary data  
17  
18 383 analysis. YH guided and supervised the research process and provided funding support. All  
19  
20 384 authors critically revised the manuscript for intellectual content, approved the final draft, and  
21  
22 385 agreed to accountability for all aspects of the work.  
23

24

24 387 **Conflict of Interest**

25 388 The authors have no affiliations with or involvement in any organization or entity with any  
26  
27 389 financial or nonfinancial interest in the subject matter or materials discussed in this  
28  
29 390 manuscript.  
30

31 391

32 392 **Ethics Approval**

33 393 The data published in news reports and websites were open to the public and free of  
34  
35 394 identifiers. The study was approved by Shanghai Jiao Tong University Public Health and  
36  
37 395 Nursing Medical Research Ethics Committee (SJUPN-202001).  
38

39 396

40 397 **Patient and Public Involvement**

41 398 This study used publicly reported patient-level data. All data were available online to the  
42  
43 399 public. No patient recruitment was involved in the study design, and no personal information  
44  
45 400 can be identified from the data.  
46

47 401

48 402 **Funding**

49 403 This project was funded by the National Natural Science Foundation of China (No.  
50  
51 404 71874111), Shanghai Municipal Health Bureau Foundation (No. 201740116), and Shanghai  
52  
53 405 Jiao Tong University Scientific and Technological Innovation Funds (YG2020YQ01,  
54  
55 406 YG2020YQ06).  
56

57 407  
58  
59  
60

1  
2  
3 4084  
5 **409 Data sharing statement**6  
7 410 Raw data are available at GitHub: [https://github.com/GuTian-TianGu/COVID-](https://github.com/GuTian-TianGu/COVID-19_NCCstudy.git)  
8 [19\\_NCCstudy.git](https://github.com/GuTian-TianGu/COVID-19_NCCstudy.git).9  
10 41211  
12 **413 Exclusive Licence**13  
14 414 I, the Submitting Author has the right to grant and does grant on behalf of all authors of the  
15 415 Work (as defined in the below author licence), an exclusive licence and/or a non-exclusive  
16 416 licence for contributions from authors who are: i) UK Crown employees; ii) where BMJ has  
17 417 agreed a CC-BY licence shall apply, and/or iii) in accordance with the terms applicable for  
18  
19 418 US Federal Government officers or employees acting as part of their official duties; on a  
20 419 worldwide, perpetual, irrevocable, royalty-free basis to BMJ Publishing Group Ltd (“BMJ”)  
21  
22 420 its licensees and where the relevant Journal is co-owned by BMJ to the co-owners of the  
23  
24 421 Journal, to publish the Work in BMJ Open and any other BMJ products and to exploit all  
25  
26 422 rights, as set out in our licence.  
27  
28

29 423

30  
31 424 The Submitting Author accepts and understands that any supply made under these terms is  
32  
33 425 made by BMJ to the Submitting Author unless you are acting as an employee on behalf of  
34  
35 426 your employer or a postgraduate student of an affiliated institution which is paying any  
36  
37 427 applicable article publishing charge (“APC”) for Open Access articles. Where the Submitting  
38  
39 428 Author wishes to make the Work available on an Open Access basis (and intends to pay the  
40  
41 429 relevant APC), the terms of reuse of such Open Access shall be governed by a Creative  
42  
43 430 Commons licence – details of these licences and which Creative Commons licence will apply  
44  
45 431 to this Work are set out in our licence referred to above.

46 432

47 **433 Word count**48 434 3585  
49  
50  
51  
52  
53  
54  
55  
56  
57  
58  
59  
60

1  
2  
3 4354 436 **Reference**

- 5 437 [1] Coronavirus disease 2019 (COVID-19) Situation Report – 62.  
6 438 [https://www.who.int/docs/default-source/coronaviruse/situation-reports/20200322-sitrep-](https://www.who.int/docs/default-source/coronaviruse/situation-reports/20200322-sitrep-62-covid-19.pdf?sfvrsn=f7764c46_2)  
7 439 [62-covid-19.pdf?sfvrsn=f7764c46\\_2](https://www.who.int/docs/default-source/coronaviruse/situation-reports/20200322-sitrep-62-covid-19.pdf?sfvrsn=f7764c46_2)  
8 440
- 9 441 [2] Lu R, Zhao X, Li J, Niu P, Yang B, Wu H *et al*. Genomic characterisation and  
10 442 epidemiology of 2019 novel coronavirus: implications for virus origins and receptor  
11 443 binding. *Lancet* 2020; **395**:565-74. doi: 10.1016/S0140-6736(20)30251-8
- 12 444 [3] Huang C, Wang Y, Li X, Ren L, Zhao J, Hu Y *et al*. Clinical features of patients infected  
13 445 with 2019 novel coronavirus in Wuhan, China. *Lancet* 2020; **395**:497-506. doi:  
14 446 10.1016/S0140-6736(20)30183-5
- 15 447 [4] Chen N, Zhou M, Dong X, Qu J, Gong F, Han Y *et al*. Epidemiological and clinical  
16 448 characteristics of 99 cases of 2019 novel coronavirus pneumonia in Wuhan, China: a  
17 449 descriptive study. *Lancet* 2020; **395**:507-13. doi: 10.1016/S0140-6736(20)30211-7  
18 450
- 19 451 [5] Xu Xiao-Wei, Wu Xiao-Xin, Jiang Xian-Gao, Xu Kai-Jin, Ying Ling-Jun, Ma Chun-  
20 452 Lian *et al*. Clinical findings in a group of patients infected with the 2019 novel  
21 453 coronavirus (SARS-Cov-2) outside of Wuhan, China: retrospective case series. *BMJ*  
22 454 2020; **368**:m606. doi: 10.1136/bmj.m606  
23 455
- 24 456 [6] Wang D, Hu B, Hu C *et al*. Clinical characteristics of 138 hospitalized patients with 2019  
25 457 novel coronavirus–infected pneumonia in Wuhan, China. *JAMA* 2020; **323**:1061–9. doi:  
26 458 10.1001/jama.2020.1585. Online ahead of print.  
27 459
- 28 460 [7] Zhang, J-J, Dong, X, Cao, Y-Y *et al*. Clinical characteristics of 140 patients infected with  
29 461 SARS-CoV-2 in Wuhan, China. *Allergy* 2020; **75**: 1730– 41. doi: 10.1111/all.14238  
30 462
- 31 463 [8] Guan WJ, Ni ZY, Hu Y, Liang WH, Ou CQ, He JX *et al*. Clinical characteristics of  
32 464 coronavirus disease 2019 in China. *N Engl J Med* 2020; **382**:1708-1720. doi:  
33 465 10.1056/NEJMoa2002032  
34 466
- 35 467 [9] Wu Z, McGoogan JM. Characteristics of and important lessons from the coronavirus  
36 468 disease 2019 (COVID-19) outbreak in China: summary of a report of 72314 cases from  
37 469 the Chinese Center for Disease Control and Prevention. *JAMA* 2020. [Epub ahead of  
38 470 print]. doi:10.1001/jama.2020.2648  
39 471
- 40 472 [10] Ruan Q, Yang K, Wang W, Jiang L, Song J. Clinical predictors of mortality due to  
41 473 COVID-19 based on an analysis of data of 150 patients from Wuhan, China. *Intensive*  
42 474 *Care Med* 2020; **46**:846-8. doi: 10.1007/s00134-020-05991-x  
43 475

- 1  
2  
3 476 [11]Shi, S., Qin, M., Shen, Bo. et al. Association of Cardiac Injury with Mortality in  
4  
5 477 Hospitalized Patients With COVID-19 in Wuhan, China. *JAMA Cardiol* 2020; **5** :802-  
6  
7 478 810. doi: 10.1001/jamacardio.2020.0950  
8 479
- 9 480 [12]Liu, J. , Tu, C. , Zhu, M. , Wang, J. , Yang, C. , Liu, W. and Xiong, B., Exploring the  
10 481 Law of Development and Prognostic Factors of Common and Severe COVID-19: A  
11 482 Retrospective Case-Control Study in 122 Patients with Complete Course of Disease.  
12 483 *Lancet* 2020. Available at SSRN 3555209.  
13 484
- 14 485 [13]Liang W, Guan W, Chen R, Wang W, Li J, Xu K *et al.* Cancer patients in SARS-CoV-2  
15 486 infection: a nationwide analysis in China. *The Lancet Oncology*.2020;**21**:335-7. doi:  
16 487 10.1016/S1470-2045(20)30096-6  
17 488
- 18 489 [14]Mao R, Liang J, Shen J, Ghosh S, Zhu LR, Yang H *et al.* Implications of COVID-19 for  
19 490 patients with pre-existing digestive diseases. *The lancet Gastroenterology & hepatology*  
20 491 2020;**5**:425-7. doi: 10.1016/S2468-1253(20)30076-5  
21 492
- 22 493 [15]Deng SQ, Peng HJ. Characteristics of and public health responses to the coronavirus  
23 494 disease 2019 outbreak in China.*J Clin Med*2020;**9**:575. doi: 10.3390/jcm9020575  
24 495
- 25 496 [16]Zhou F, Yu T, Du R, Fan G, Liu Y, Liu Z, *et al.* Clinical course and risk factors for  
26 497 mortality of adult inpatients with COVID-19 in Wuhan, China: a retrospective cohort  
27 498 study. *Lancet* 2020. doi: 10.1016/S0140-6736(20)30566-3  
28 499
- 29 500 [17]Appelros P, Stegmayr B, Terent A. Sex differences in stroke epidemiology: a systematic  
30 501 review, *Stroke* 2009; **40**: 1082-90. doi: 10.1161/STROKEAHA.108.540781  
31 502
- 32 503 [18]Camp P G , Goring S M . Gender and the diagnosis, management, and surveillance of  
33 504 chronic obstructive pulmonary disease. *Ann AmThorac Soc*2007;**4**:686-691. doi:  
34 505 10.1513/pats.200706-081SD  
35 506
- 36 507 [19]Tchkonia T, Kirkland JL. Aging, cell senescence, and chronic disease: emerging  
37 508 therapeutic strategies. *JAMA* 2018;**320**:1319–20. doi: 10.1001/jama.2018.12440  
38 509
- 39 510 [20]Prasad S, Sung B, Aggarwal BB. Age-associated chronic diseases require age-old  
40 511 medicine: Role of chronic inflammation. *Prev Med* 2012;**54**:S29-S37. doi:  
41 512 10.1016/j.ypmed.2011.11.011  
42 513
- 43 514 [21]Chinese COVID-19 Outbreak Distribution System. Available  
44 515 at<http://2019ncov.chinacdc.cn/2019-nCoV/>  
45 516  
46 517  
47  
48  
49  
50  
51  
52  
53  
54  
55  
56  
57  
58  
59  
60

- 1  
2  
3 518 [22]Pan A, Liu L, Wang C, *et al.* Association of public health interventions with the  
4 519 epidemiology of the COVID-19 outbreak in Wuhan, China. *JAMA*. 2020; 323: 1915-  
5 520 23. doi:10.1001/jama.2020.6130  
6 521  
7 522 [23]Azoulay L, Dell'Aniello S, Gagnon B, *et al.* Metformin and Incidence of Prostate Cancer  
8 523 in Patients with Type 2 Diabetes. *Cancer Epidemiol Biomarkers Prev* 2011;**20**:337–344.  
9 524 doi:10.1158/1055-9965  
10 525  
11 526 [24]Schlienger RG, Fedson DS, Jick SS, Jick H, Meier CR. Statins and the risk of pneumonia:  
12 527 a population-based, nested case-control study. *Pharmacotherapy* 2007; **27**: 325–32.  
13 528 doi:10.1592/phco.27.3.325  
14 529  
15 530 [25]Lipscombe LL, Levesque LE, Gruneir A, *et al.* Antipsychotic drugs and the risk of  
16 531 hyperglycemia in older adults without diabetes: a population-based observational  
17 532 study. *Am J Geriatr Psychiatry* 2011;**19**:1026-33. doi: 10.1097/JGP.0b013e318209dd24  
18 533  
19 534 [26]Lipscombe LL, Gomes T, Levesque LE, *et al.* Thiazolidinediones and cardiovascular  
20 535 outcomes in older patients with diabetes. *J Am Med Assoc* 2007;**298**:2634–43. doi:  
21 536 10.1001/jama.298.22.2634  
22 537  
23 538 [27]Levesque LE, Brophy JM, Zhang B. The risk for myocardial infarction with  
24 539 cyclooxygenase-2 inhibitors: a population study of elderly adults. *Ann Intern*  
25 540 *Med* 2005;**142**:481–9. doi:10.7326/0003-4819-142-7-200504050-00113  
26 541  
27 542 [28]Cerfolio RJ, Bryant AS. Survival and outcomes of pulmonary resection for non-small  
28 543 cell lung cancer in the elderly: A nested case-control study. *Ann Thorac Surg*  
29 544 2006;**82**:424-30. doi:10.1016/j.athoracsur.2006.02.085  
30 545  
31 546 [29]Khandaker G, Rashid H, Zurynski Y, *et al.* Nosocomial vs community-acquired  
32 547 pandemic influenza A (H1N1) 2009: a nested case-control study. *J Hosp Infect* 2012;  
33 548 **82**:94–100. doi:10.1016/j.jhin.2012.07.006  
34 549  
35 550 [30]Langholz, B. and Clayton, D. Sampling Strategies in Nested Case-Control  
36 551 Studies. *Environ Health Persp*1994;**102**: 47–51. doi: 10.1289/ehp.94102s847  
37 552  
38 553 [31]Stoer, N. and Samuelsen, S. Inverse probability weighting in nested case-control studies  
39 554 with additional matching - a simulation study. *Stat Med*2013;**32**, 5328-39. doi:  
40 555 10.1002/sim.6019  
41 556  
42 557 [32]Stoer, N. and Samuelsen, S. multipleNCC. Weighted Cox-Regression for Nested Case-  
43 558 Control Data. R package version 1.2-2.2020. Available at [https://CRAN.R-](https://CRAN.R-project.org/package=multipleNCC)  
44 559 [project.org/package=multipleNCC](https://CRAN.R-project.org/package=multipleNCC)  
45 560  
46 561



- 1  
2  
3 562 [33]George B, Seals S, Aban I. Survival analysis and regression models. *J*  
4 563 *NuclCardiol*2014;**21**:686–94. doi: 10.1007/s12350-014-9908-2  
5 564
- 6 565 [34]Annesi I, Moreau T, Lellouch J. Efficiency of the logistic regression and Cox  
7 566 proportional hazards models in longitudinal studies. *Stat Med* 1989; **8**: 1515–21. doi:  
8 567 10.1002/sim.4780081211  
9 568
- 10 569 [35]Tralhão A, Póvoa P. Cardiovascular Events After Community-Acquired Pneumonia: A  
11 570 Global Perspective with Systematic Review and Meta-Analysis of Observational Studies,  
12 571 *J Clin Med* 2020;**9**:414. doi:10.3390/jcm9020414  
13 572
- 14 573 [36]Kirchhof, P.,Benussi, S., Kotecha, D.,Ahlsson, A.,Atar, D.,Casadei, B., Castella,  
15 574 M.,Diener, H.C.,Heidbuechel, H., Hendriks, J. *et al.* 2016 ESC Guidelines for the  
16 575 management of atrial fibrillation developed in collaboration with EACTS. *Eur. Heart*  
17 576 *J*2016;**37**:2893–962. doi: 10.1093/eurheartj/ehw210  
18 577
- 19 578 [37]Libby, P. Mechanisms of Acute Coronary Syndromes and Their Implications for  
20 579 Therapy. *N. Engl. J. Med* 2013;**368**:2004–13. doi: 10.1056/NEJMra1216063  
21 580
- 22 581 [38]Madjid, M., Vela, D., Khalili-Tabrizi, H.,Casscells, S.W.,Litovsky, S. Systemic  
23 582 infections cause exaggerated local inflammation in atherosclerotic coronary arteries:  
24 583 Clues to the triggering effect of acute infections on acute coronary syndromes. *Tex. Heart*  
25 584 *Inst. J* 2007; **34**:11–8. pmid: <https://www.ncbi.nlm.nih.gov/pmc/articles/PMC1847934/>  
26 585
- 27 586 [39]Mauriello, A.,Sangiorgi, G.,Fratoni, S., Palmieri, G.,Bonanno, E.,Anemona, L., Schwartz,  
28 587 R.S.,Spagnoli, L.G. Diffuse and Active Inflammation Occurs in Both Vulnerable and  
29 588 Stable Plaques of the Entire Coronary Tree A Histopathologic Study of Patients Dying of  
30 589 Acute Myocardial Infarction. *J Am Coll Cardiol*2005;**45**:1585–93. doi:  
31 590 10.1016/j.jacc.2005.01.054  
32 591
- 33 592 [40]Zhu J., Zhang X., Shi G., Yi K., Tan X. Atrial fibrillation is an independent risk factor  
34 593 for hospital-acquired pneumonia. *PLoS ONE*. 2015;**10**:e0131782. doi:  
35 594 10.1371/journal.pone.0131782  
36 595
- 37 596 [41]Li X, Xu S, Yu M, et al. Risk factors for severity and mortality in adult COVID-19  
38 597 inpatients in Wuhan. *J Allergy Clin Immunol*. 2020; **146** :110-8.  
39 598 doi:10.1016/j.jaci.2020.04.006  
40 599
- 41 600
- 42 601 [42]Qualls, N., Levitt, A., Kanade, N., *et al.* Community mitigation guidelines to prevent  
43 602 pandemic influenza - United States, 2017. *MMWR Recomm Rep*. 2017;**66**:1–34.  
44 603 doi:10.15585/mmwr.rr6601a1  
45 604  
46  
47  
48  
49  
50  
51  
52  
53  
54  
55  
56  
57  
58  
59  
60

1  
2  
3 605 [43] Ji, Y., Ma, Z., Peppelenbosch, MP., Pan Q. Potential association between COVID-19  
4 606 mortality and health-care resource availability. *Lancet Glob Health*. 2020; **8** :e480.  
5 607 doi:10.1016/S2214-109X(20)30068-1  
6 608

7  
8 609 [44] Lauer SA, Grantz KH, Bi Q, Jones FK, Zheng Q, Meredith HR, et al. The Incubation  
9 610 Period of Coronavirus Disease 2019 (COVID-19) From Publicly Reported Confirmed  
10 611 Cases: Estimation and Application. *Ann Intern Med* 2020; **172**:577-82.  
11 612 doi:10.7326/M20-0504  
12  
13

14 613  
15 614

## 16 615 **Correspondence**

17  
18 616 Address offprint requests to Dr. Wu at School of Social Development, East China Normal  
19 617 University, 500 Dongchuan Rd., Shanghai 200241, China ([rjwu@re.ecnu.edu.cn](mailto:rjwu@re.ecnu.edu.cn)), or Dr. He  
20 618 at College of Public Health, Shanghai Jiao Tong University School of Medicine, South  
21  
22 619 Chongqing Rd., No. 227, Shanghai 200025, China ([hypcyr@sina.com](mailto:hypcyr@sina.com)), respectively.  
23  
24  
25 620

621

622 **Tables and Figures****Table 1.** Patient Characteristics, stratified by survival status\*

|                                       | <b>Overall</b><br>(N=275), n (%) | <b>Case (deaths)</b><br>(N=94), n (%) | <b>Control (survivors)</b><br>(N=181), n (%) | <b>P Value †</b> |
|---------------------------------------|----------------------------------|---------------------------------------|----------------------------------------------|------------------|
| <b>Matching variables</b>             |                                  |                                       |                                              |                  |
| Age                                   |                                  |                                       |                                              |                  |
| Mean (SD)                             | 66.4 (14.5)                      | 70.7 (13.3)                           | 64.2 (14.7)                                  | <b>&lt;0.001</b> |
| Median (IQR)                          | 68.0 [22]                        | 72.5 [16]                             | 67.0 [22]                                    | -                |
| Male                                  | 173 (62.9)                       | 56 (59.6)                             | 117 (64.6)                                   | 0.49             |
| <b>Other covariates</b>               |                                  |                                       |                                              |                  |
| Before 01/22/2020                     | 70 (25.5)                        | 27 (28.7%)                            | 43 (23.8)                                    | 0.52             |
| History of surgery                    | 10 (3.6)                         | 4 (4.3)                               | 6 (3.3)                                      | 0.74             |
| <b>Cardiocerebrovascular diseases</b> |                                  |                                       |                                              |                  |
| Hypertension                          | 109 (39.6)                       | 42 (44.7)                             | 67 (37.0)                                    | 0.27             |
| CHD                                   | 40 (14.5)                        | 25 (26.6)                             | 15 (8.3)                                     | <b>&lt;0.001</b> |
| Cardiac failure                       | 22 (8.0)                         | 10 (10.6)                             | 12 (6.6)                                     | 0.35             |
| Cerebral infarction                   | 19 (6.9)                         | 11 (11.7)                             | 8 (4.4)                                      | <b>0.05</b>      |
| <b>Endocrine diseases</b>             |                                  |                                       |                                              |                  |
| Diabetes                              | 72 (26.2)                        | 26 (25.4)                             | 46 (27.7)                                    | 0.80             |
| <b>Respiratory diseases</b>           |                                  |                                       |                                              |                  |
| Chronic bronchitis                    | 19 (6.9)                         | 7 (7.4)                               | 12 (6.6)                                     | 1.00             |
| COPD                                  | 12 (4.4)                         | 7 (7.4)                               | 5 (2.8)                                      | 0.14             |
| <b>Other diseases</b>                 |                                  |                                       |                                              |                  |
| Renal failure                         | 12 (4.4)                         | 6 (6.4)                               | 6 (3.3)                                      | 0.38             |
| Hepatic failure                       | 3 (1.1)                          | 3 (3.2)                               | 0 (0)                                        | 0.07             |
| <b>Comorbidity score</b>              |                                  |                                       |                                              |                  |
| Mean (SD)                             | <b>1.22 (1.21)</b>               | <b>1.60 (1.32)</b>                    | <b>1.02 (1.10)</b>                           | <b>&lt;0.001</b> |

CHD: coronary heart disease; COPD: chronic obstructive pulmonary disease.

\*Mean (standard deviation) is reported for the continuous variables and the counts (%) for categorical variables. p values were calculated by the Mann–Whitney U test,  $\chi^2$  test, or Fisher's exact test, as appropriate.

Bold: statistically significant using threshold  $p < 0.05$

623

624

625

626

627

628

**Table 2.** Univariate and multivariate model result from weighted Cox proportional hazard regression

| Characteristic        | Univariate       |                  | Multivariate     |                  |               |                  | P Value           |                  |
|-----------------------|------------------|------------------|------------------|------------------|---------------|------------------|-------------------|------------------|
|                       | HR (95% CI)      | P Value          | HR (95% CI)      | P Value          | HR (95% CI)   | P Value          |                   |                  |
| Age                   | 1.05 (1.0-1.1)   | <b>&lt;0.001</b> | 1.0 (1.0-1.1)    | <b>&lt;0.001</b> | 1.0 (1.0-1.1) | <b>&lt;0.001</b> | 1.04 (1.02-1.06)  | <b>&lt;0.001</b> |
| Male                  | 0.76 (0.5-1.2)   | 0.24             | 1.1 (0.7-1.7)    | 0.74             | 1.1 (0.7-1.7) | 0.71             | 0.997 (0.62-1.60) | 0.99             |
| Before 01/22/2020     | 1.12 (0.7-1.8)   | 0.66             | 1.3 (0.8-2.1)    | 0.29             | 1.2 (0.7-1.9) | 0.48             | 1.21 (0.74-1.98)  | 0.45             |
| Comorbidity Score     | 1.50 (1.27-1.75) | <b>&lt;0.001</b> | 1.31 (1.11-1.54) | <b>0.001</b>     | NA            | NA               | NA                | NA               |
| Cardiocerebrovascular |                  |                  |                  |                  |               |                  |                   |                  |
| CHD                   | 4.19 (2.5-7.1)   | <b>&lt;0.001</b> | NA               | NA               | 2.9 (1.7-4.9) | <b>&lt;0.001</b> | 3.01 (1.82-4.98)  | <b>&lt;0.001</b> |
| Hypertension          | 1.37 (0.9-2.2)   | 0.17             | NA               | NA               | NA            | NA               | NA                | NA               |
| Cardiac failure       | 1.85 (0.9-3.9)   | 0.10             | NA               | NA               | NA            | NA               | NA                | NA               |
| Cerebral infarction   | 2.86 (1.4-5.8)   | <b>0.004</b>     | NA               | NA               | NA            | NA               | 1.90 (0.94-3.8)   | 0.07             |
| Respiratory           |                  |                  |                  |                  |               |                  |                   |                  |
| Chronic bronchitis    | 1.05 (0.4-2.5)   | 0.55             | NA               | NA               | NA            | NA               | NA                | NA               |
| COPD                  | 2.61 (1.2-5.6)   | <b>0.01</b>      | NA               | NA               | NA            | NA               | 1.85 (0.89-3.85)  | 0.10             |
| Endocrine             |                  |                  |                  |                  |               |                  |                   |                  |
| Diabetes              | 1.14 (0.7-1.9)   | 0.61             | NA               | NA               | NA            | NA               | NA                | NA               |
| Others                |                  |                  |                  |                  |               |                  |                   |                  |
| Renal failure         | 2.30 (0.9-6.0)   | 0.09             | NA               | NA               | NA            | NA               | 2.02 (0.81-5.07)  | 0.13             |
| History of surgery    | 1.71 (0.6-5.1)   | 0.34             | NA               | NA               | NA            | NA               | NA                | NA               |

HR=hazard ratio;

CHD=coronary heart disease;

COPD=chronic obstructive pulmonary disease;

Bold: statistically significant using threshold  $p < 0.05$ .

629

630

631

1  
2  
3 632  
4

5 633 **Figure 1:** Patient flow diagram detailing included subjects and exclusion criteria  
6 634

7  
8 635 **Figure 2:** Estimated survival probability over time from the adjusted Cox proportional hazard  
9  
10 636 model for an example patient profile (65-year-old female without CHD [dashed line] or with  
11 637 CHD [solid line], who had no other comorbidities). The estimated 30-day survival probability  
12 638 was 0.53 (95% CI [0.34-0.82]) for patients with pre-existing CHD, while 0.85 (95% CI [0.79-  
13 639 0.91]) for those without ( $p<0.001$ ). CHD=coronary heart disease.  
14  
15  
16 640

17  
18  
19  
20  
21  
22  
23  
24  
25  
26  
27  
28  
29  
30  
31  
32  
33  
34  
35  
36  
37  
38  
39  
40  
41  
42  
43  
44  
45  
46  
47  
48  
49  
50  
51  
52  
53  
54  
55  
56  
57  
58  
59  
60

For peer review only

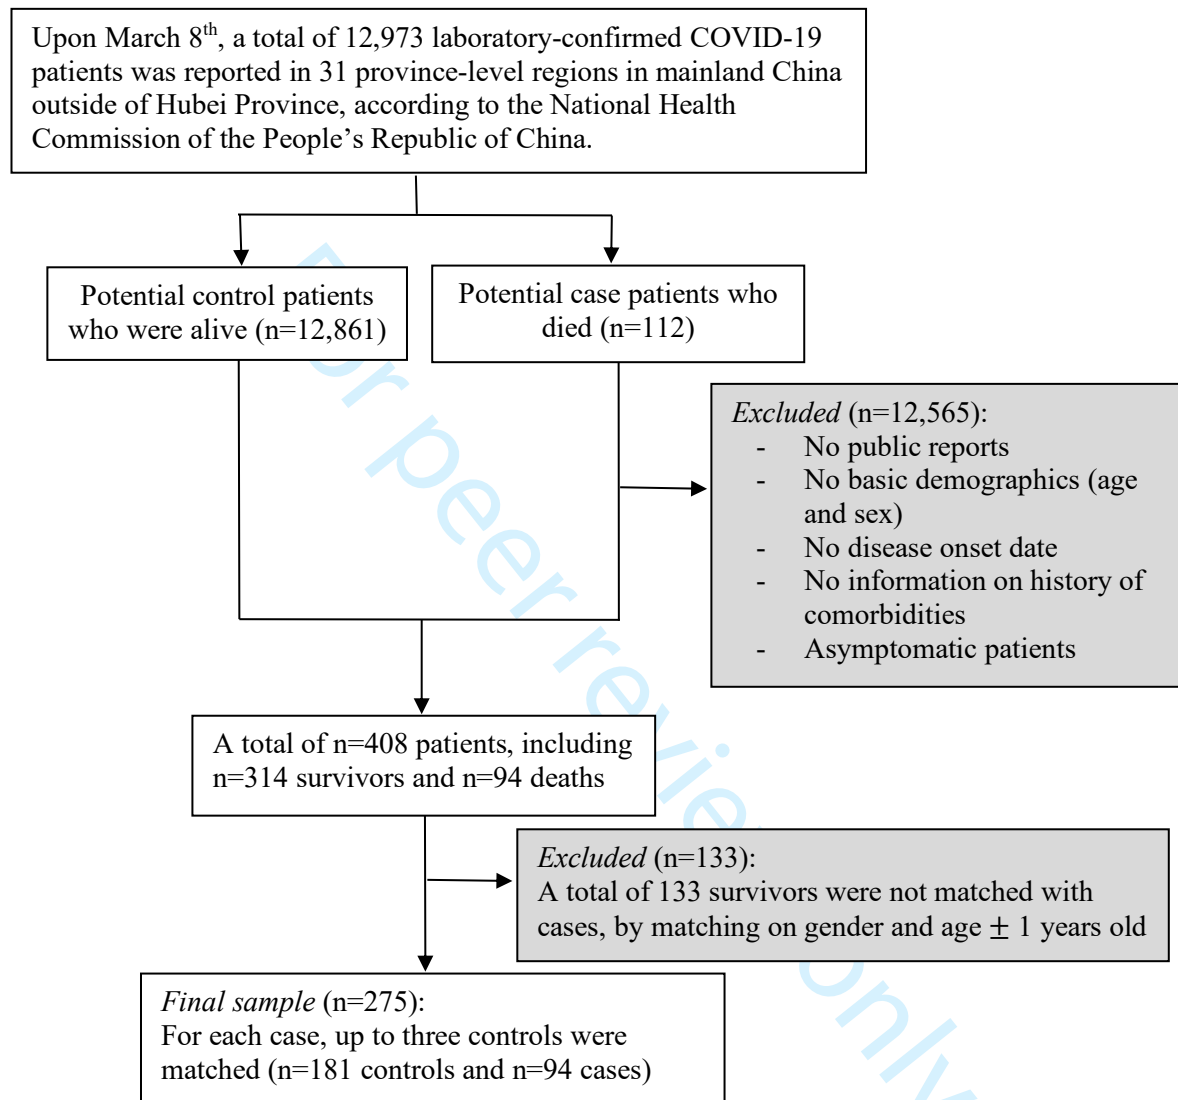

**Figure 1:** Patient flow diagram detailing included subjects and exclusion criteria

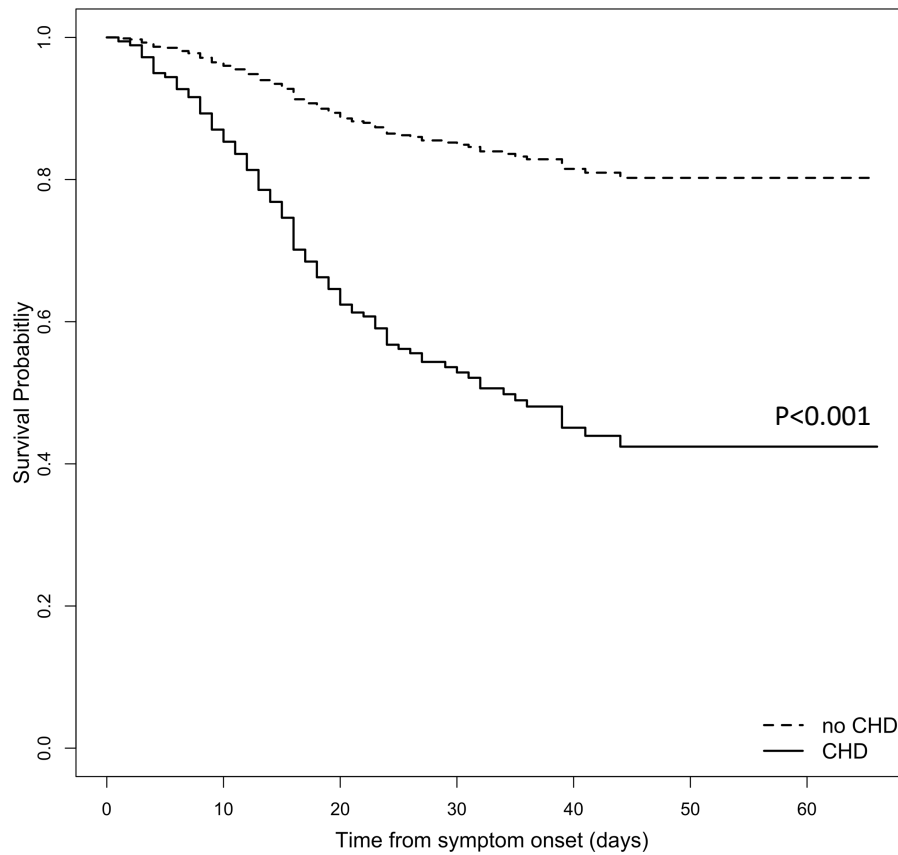

**Figure 2:** Estimated survival probability over time from the adjusted Cox proportional hazard model for a sample patient profile (65-year-old female without CHD [dashed line] or with CHD [solid line], who had no other comorbidities). The estimated 30-day survival probability was 0.53 (95% CI [0.34-0.82]) for patients with pre-existing CHD, while 0.85 (95% CI [0.79-0.91]) for those without ( $p<0.001$ ). CHD=coronary heart disease.

**Supplementary Table S1.** Sample distribution across all 32 province-level in mainland China

| Province     | Survivors        |              | Deaths           |              |
|--------------|------------------|--------------|------------------|--------------|
|              | National total n | Sample n (%) | National total n | Sample n (%) |
| Guangdong    | 1343             | 9 (0.67)     | 8                | 8 (100.00)   |
| Henan        | 1265             | 7 (0.55)     | 22               | 17 (77.30)   |
| Zhejiang     | 1205             | 10 (0.83)    | 1                | 1 (100.00)   |
| Hunan        | 1003             | 15 (1.50)    | 4                | 2 (50.00)    |
| Anhui        | 981              | 9 (0.92)     | 6                | 6 (100.00)   |
| Jiangxi      | 932              | 3 (0.32)     | 1                | 1 (100.00)   |
| Shandong     | 692              | 66 (9.54)    | 6                | 6 (100.00)   |
| Jiangsu      | 618              | 13 (2.10)    | 0                | 0 (100.00)   |
| Chongqing    | 576              | 0 (0.00)     | 6                | 6 (100.00)   |
| Sichuan      | 535              | 4 (0.75)     | 3                | 3 (100.00)   |
| Heilongjiang | 475              | 6 (1.26)     | 13               | 9 (69.20)    |
| Beijing      | 425              | 3 (0.71)     | 8                | 3 (37.50)    |
| Shanghai     | 339              | 3 (0.88)     | 3                | 3 (100.00)   |
| Hebei        | 312              | 6 (1.92)     | 6                | 6 (100.00)   |
| Fujian       | 294              | 2 (0.68)     | 1                | 1 (100.00)   |
| Guangxi      | 250              | 2 (0.80)     | 2                | 2 (100.00)   |
| Shaanxi      | 239              | 6 (2.51)     | 1                | 1 (100.00)   |
| Yunnan       | 171              | 3 (1.75)     | 2                | 1 (50.00)    |
| Hainan       | 163              | 5 (3.07)     | 6                | 6 (100.00)   |
| Guizhou      | 144              | 2 (1.39)     | 2                | 2 (100.00)   |
| Tianjin      | 132              | 4 (3.03)     | 3                | 3 (100.00)   |
| Shanxi       | 131              | 2 (1.53)     | 0                | 0 (100.00)   |
| Liaoning     | 125              | 0 (0.00)     | 1                | 0 (0.00)     |
| Gansu        | 123              | 1 (0.81)     | 2                | 2 (100.00)   |
| Jilin        | 92               | 1 (1.09)     | 1                | 1 (100.00)   |
| Xinjiang     | 76               | 0 (0.00)     | 3                | 3 (100.00)   |
| Neimenggu    | 73               | 2 (2.74)     | 1                | 1 (100.00)   |
| Ningxia      | 75               | 0 (0.00)     | 0                | 0 (100.00)   |
| Hubei*       | NA               | NA           | NA               | NA           |
| Total        | 12698            | 275 (2.17)   | 112              | 94 (83.9)    |

\*Hubei Province was excluded from this study



**Supplementary Table S2: Results from unweighted logistic regression**

|                     | Multivariate     |              |               |              |               |              |
|---------------------|------------------|--------------|---------------|--------------|---------------|--------------|
|                     | OR (95% CI)      | P Value      | OR (95% CI)   | P Value      | OR (95% CI)   | P Value      |
| Age                 | 1.0 (1.0-1.1)    | <b>0.03</b>  | 1.0 (1.0-1.1) | <b>0.007</b> | 1.0 (1.0-1.1) | <b>0.05</b>  |
| Male                | 1.1 (0.6-1.7)    | 0.98         | 1.1 (0.6-1.8) | 0.87         | 1.0 (0.5-1.7) | 0.89         |
| Before 01/11/2020   | 1.7 (0.9-3.1)    | 0.09         | 1.6 (0.9-2.9) | 0.12         | 1.7 (0.9-3.1) | 0.09         |
| Comorbidity Score   | 1.12 (1.09-1.72) | <b>0.007</b> | NA            | NA           | NA            | NA           |
| CHD                 | NA               | NA           | 3.3 (1.6-6.9) | <b>0.002</b> | 3.4 (1.7-7.4) | <b>0.001</b> |
| Cerebral infarction | NA               | NA           | NA            | NA           | 2.5 (0.9-7.0) | 0.08         |
| COPD                | NA               | NA           | NA            | NA           | 2.5 (0.7-9.4) | 0.14         |
| Renal failure       | NA               | NA           | NA            | NA           | 1.9 (0.5-7.0) | 0.30         |

OR=odds ratio; CHD=coronary heart disease; COPD=chronic obstructive pulmonary disease.

Bold: statistically significant using threshold  $p < 0.05$
